# Reducing compositional fluctuations facilitates artificial selection of microbial community function

Li Xie\* and Wenying Shou\*

Division of Basic Sciences, Fred Hutch Cancer Research Center, Seattle, USA

## Abstract

Multi-species microbial communities often display functions - biochemical activities unattainable by member species alone, such as fighting pathogens or degrading wastes. Artificially selecting high community function is useful but rarely attempted. Here, we theoretically examine artificial selection of Helper-Manufacturer communities. Helpers digest Waste and generate Byproduct essential to Manufacturers; Manufacturers divert a fraction of their growth to make Product. Thus, community function - total Product accumulated as a low-density “Newborn” community grows over “maturation time”  $T$  into an “Adult” community - is costly to Manufacturers. Despite pre-optimizing Helper and Manufacturer monocultures, community function is sub-optimal. To improve community function, we simulate community selection by allowing cells in Newborn communities to grow and mutate, and select highest-functioning Adults to “reproduce” by diluting each into multiple Newborns. We find that fluctuations in Newborn composition during community reproduction (e.g. due to pipetting) can interfere with selection, and reducing fluctuations (e.g. via cell sorting) facilitates selection.

## Introduction

Multi-species microbial communities often display important *functions* - biochemical activities not achievable by member species in isolation<sup>1 2</sup>. For example, a six-species microbial community, but not any member species alone, cleared relapsing *Clostridium difficile* infections in mice [1]. As another example, cellulose-degrading communities often harbor non-cellulolytic aerobic bacteria which, by depleting oxygen, establish a proper anaerobic environment for cellulolytic bacteria [2].

Community functions arise from *interactions* where an individual alters the physiology of another individual. Thus, to improve community function, one could take a “bottom-up” approach by identifying and modifying interactions [3, 4]. In reality, this is no trivial task given that even two species can engage in complex interactions: each species can release tens or more compounds, many of which could influence partner species in diverse fashions [5, 6, 7, 8]. Then, from this “haystack” of interactions, we will need to identify those interactions that are critical for community function, and modify them by altering species genotypes or abiotic environment.

---

\* Author of correspondence

<sup>1</sup>Community function may be defined as biochemical activities not achievable to the same extent by summing activities of member species monocultures. Our definition here is more restrictive.

<sup>2</sup>A community function is a community trait, but a community trait may or may not be a community function. For example, total population size is a community trait and not a community function, since individual species also has a population size. Here, we are interested in community function.

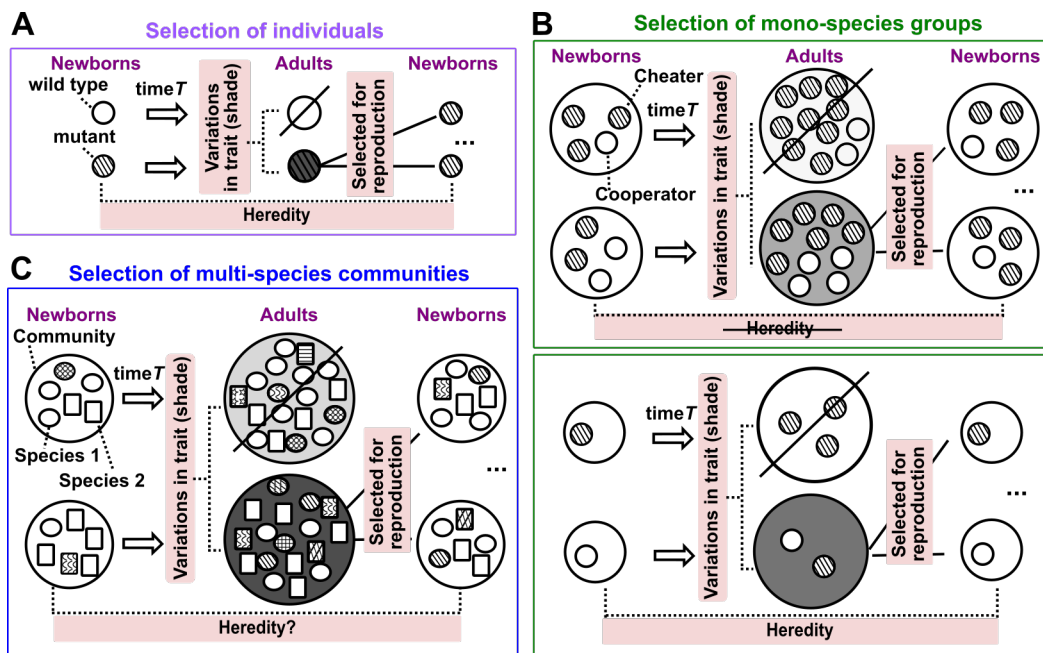

**Figure 1: Artificial selection can be more challenging for multi-species communities than for individuals or groups of individuals.** We consider artificial selection on a trait, where the entity under selection is an individual (A), a mono-species group (B), or a multi-species community (C). In each selection cycle, a population of “Newborn” entities (which can be individuals, mono-species groups, or multi-species communities) grow for a fixed maturation time  $T$  to become “Adults”. Adults expressing a higher level of the desired trait (darker entity shade) are artificially selected to have a higher chance of reproduction. An individual reproduces by making copies of itself, while an Adult group or community reproduces by randomly splitting into multiple Newborns. (A) Artificial selection on individuals. Unlike natural selection which selects for fastest-growing cells, in artificial selection we select for traits which often impose a fitness cost to individuals (e.g. over-expression of a recombinant protein). We artificially select for individuals with desired trait and allow only these individuals to reproduce. Phenotypes are largely heritable from one generation to the next due to the constancy of genotypes, so long as mutation and recombination rates are not extraordinarily high. Artificial selection on individuals has successfully yielded improved green fluorescent protein [9], enzymes with new properties [10], and antibody fragments with high antigen-binding affinity [11]. (B) Artificial selection on mono-species groups. Group selection, and in a related sense, kin selection [12, 13, 14, 15, 16, 17, 18, 19, 20, 21, 22, 23, 24, 25, 26], have been extensively examined to explain, for example, the evolution of traits that lower individual fitness (e.g. sterile ants) but increase the success of a group. In this diagram, cooperators pay a fitness cost (giving rise to two instead of three offspring) to generate the product of interest (shade), while cheater mutants avoid paying the fitness cost (giving rise to three offspring) and generate no product. The trait of interest is the total amount of product in an Adult group. Artificial selection favors cooperator-dominated groups over cheater-dominated groups, although within a group, cheaters grow faster than cooperators. If Newborn groups have a large population size (**top**), then both variation and heredity are compromised: due to large size, all Newborn groups will harbor similar fractions of cheaters, thereby diminishing inter-group variations. During maturation, cheater frequency will increase, thereby diminishing heredity. In contrast, when Newborn groups are initiated at a small size such as one individual (**bottom**), a Newborn group will comprise either a cooperator or a cheater, thereby ensuring variation. Furthermore, even if cheater mutants were to arise during maturation, some Newborn groups of the next cycle will by chance inherit a cooperator, thereby ensuring some level of heredity. Thus, group selection can be effective when Newborn size is small [15, 27, 28]. (C) Artificial selection on multi-species communities. Since maturation time  $T$  is defined by an experimentalist, Adulthood may or may not correspond to a specific physiological state. Mechanisms that reduce heredity include: 1) changes in genotype and species abundance within a cycle due to evolution and ecological interactions, and 2) random fluctuations in Newborn composition during community reproduction.

31 Alternatively, one could take a “top-down” approach by artificially selecting for microbial communities  
32 exhibiting high community function. In theory, artificial selection can be applied to any population of entities.  
33 An entity can be, for example, an individual (Figure 1A), a mono-species group of individuals (Figure 1B),  
34 or a multi-species community (Figure 1C) [29]. The boundary of a group or a community is artificially  
35 imposed (e.g. in microtiter wells or fluidic droplets). Successful artificial selection requires that i) entities  
36 display trait variations; ii) trait variations can be selected to result in differential fitness in terms of entity  
37 survival and reproduction; and iii) entity trait is sufficiently heritable from one selection cycle to the next  
38 [30]. In all three types of selections, variations in a trait can be introduced by mutations and recombinations  
39 in individuals (different hatch patterns in Figure 1). Artificial selection also operates similarly among the  
40 three types of selections. Heredity is generally high when selecting for individuals (Figure 1A legend). When  
41 selecting for groups <sup>3</sup>, if Newborn groups have a small population size, sufficient heredity can be achieved  
42 to allow group selection to work (Figure 1B legend).

43 During artificial community selection, we choose a sufficiently short maturing time  $T$  so that newly-  
44 arising genotypes rarely reach high frequency within  $T$ . This way, community function is mostly determined  
45 by Newborn *composition* (the biomass of each genotype in each member species). We define *community*  
46 *variation* as the dissimilarity in composition among Newborn communities within a cycle, and *community*  
47 *heredity* as the similarity of Newborn composition from one cycle to the next <sup>4</sup>. Community variation  
48 and heredity are almost two opposite sides of a coin. Mutations, by creating phenotypic variations among  
49 individuals, can increase community variation and reduce community heredity. Furthermore during com-  
50 munity reproduction, stochastic fluctuations in Newborn composition increases community variation and  
51 reduces heredity. During community maturation, genotype and species abundances can rapidly change due  
52 to ecological interactions and evolution (e.g. “cheaters” out-competing “cooperators” in Figure 1). This fur-  
53 ther compromises heredity. Thus, artificial selection of community function may be hindered by insufficient  
54 heredity.

55 How effective is community selection in theory and in practice? So far, community selection has been  
56 attempted only a small number of times. In simulations, multi-species communities were selected based on  
57 how community abiotic environment departed from or approached an arbitrary target [36]. Indeed, this  
58 community trait responded to community selection, and in at least some cases, the selected community trait  
59 could not be realized by single species. However, the response quickly leveled off, and was generated even  
60 without mutations. Thus, community selection likely acted on preexisting variations in community species  
61 composition. In experiments, artificial selections have been performed on complex microbial communities  
62 to improve their abilities to degrade a pollutant or support plant growth [37, 38]. Strikingly, a community  
63 trait may sometimes fail to improve despite selection, and may improve even without selection [37, 38].

64 Intriguing as these selection attempts might be, how they operated is unknown. First, is the trait under  
65 selection a community function or simply a trait of one member species? If the latter, then community  
66 selection is not even needed. Second, does selection act solely on species compositions or also on newly-  
67 arising genotypes? This is an important distinction because if selection acts solely on species compositions,  
68 then without immigration of new species, community function will quickly level off [36]. On the other  
69 hand, if selection acts on genotypes, then community function can potentially continue to improve as new  
70 genotypes are generated. Third, does community selection run counter to natural selection? For example,  
71 during pollutant remediation, microbes may pay a fitness cost to release a pollutant-degrading enzyme. In  
72 this case, selecting high-degradation communities would favor high-degraders, while natural selection would  
73 favor low-degraders. Alternatively, microbes may exploit pollutant as a nutrient for growth. In this case,  
74 high-degraders are also fast growers, and are favored by both natural selection and community selection. In

<sup>3</sup>Group selection is often applied in a broader sense to spatially-structured populations to explain the evolution of cooperative traits [31, 32]. In these cases, individuals form groups. Within each cycle, individuals grow based on their genotype (e.g. cooperators or cheaters) and group environment (cooperator-dominated or cheater-dominated). At the end of each cycle, individuals migrate among groups. However, if there are no births or deaths of groups, then selection acts on individuals instead of on groups [33, 34, 35].

<sup>4</sup>For any microbial community in the absence of stochasticity (e.g. mutations, stochastic death events), its dynamics starting at a given abiotic environment is determined by Newborn composition. Specifically, for a community with  $n$  species, for simplicity let's assume that each species has one quantitative phenotype. The community composition can then be specified by a set of functions  $\{S_1(x_1), S_2(x_2), \dots, S_n(x_n)\}$  where  $S_i(x_i)$  describes the biomass distribution of the  $i$ th species over the quantitative phenotype  $x_i$ . A simple definition of the similarity between two microbial communities with compositions  $\{S_1(x_1), S_2(x_2), \dots, S_n(x_n)\}$  and  $\{S_1^*(x_1), S_2^*(x_2), \dots, S_n^*(x_n)\}$  can then be  $\sum_{i=1}^n w_i \int |S_i(x_i) - S_i^*(x_i)| dx_i$ , where  $\{w_i\}$  is a set of weights.

75 this case, community selection may not even be necessary.

76 In this article, we seek a theoretical understanding of how to rapidly improve community function when  
77 natural selection tends to reduce it. In the accompanying article, we explore how selection dynamics is  
78 shaped by community function landscape and constrained by steady state species composition, and contrast  
79 different selection regimens. These theoretical insights are intended to guide future experiments.

## 80 Results

### 81 The Helper-Manufacturer community

82 We consider a community of two asexual microbial species that together convert Waste (such as cellulose) to  
83 a useful Product P (such as a biofuel or an anti-cancer drug). Such communities have in fact been engineered  
84 in the laboratory [39, 40, 41, 42]. In our community (Figure 2), Waste is supplied in excess. Helper H but  
85 not Manufacturer M can grow by digesting Waste. As H grows, it releases Byproduct B, which serves as  
86 the sole carbon source for Manufacturer M. Helper and Manufacturer also compete for a shared Resource  
87 R (such as reduced nitrogen). Manufacturer invests  $f_P$  fraction of its growth potential ( $f_P g_M$ ) to make  
88 Product P, and uses the rest  $(1 - f_P)g_M$  for its actual biomass growth. Community function  $P(T)$  is defined  
89 as the total amount of Product P accumulated when a newly-assembled “Newborn” community matures  
90 into an “Adult” community over maturation time  $T$  (Figure 4A). Thus, community function incurs a fitness  
91 cost  $f_P$  to M. Low-producing and non-producing mutants reduce community function and are more fit than  
92 high-producers, a common problem when employing engineered microbes. In Methods Section 7, we explain  
93 pathology associated with two alternative definitions of community function.

94 We use a stochastic, individual-based model to describe community dynamics (Methods Section 5). Each  
95 cell continuously increases its biomass at the actual growth rate ( $g_H$  for H and  $(1 - f_P)g_M$  for M). Biomass  
96 growth rate increases with concentration(s) of required nutrient(s) until maximal growth rate is achieved:  
97 For H which requires Resource R and waste W, since waste W is in excess, we model growth rate as a  
98 function of R using the Monod Equation (Figure 9A). For M which requires both Resource R and Byproduct  
99 B, we adopt a dual-substrate model by Mankad and Bungay (Figure 9B) due to its experimental support  
100 [43] (Figure 10). Cell biomass starts at 1, and once it grows to the division threshold of 2, the cell divides  
101 into two equal halves, thus capturing experimental observations on *E. coli* growth [44]. Our model describes  
102 the continuous dynamics of biomass increase (Figure 11), and tracks discrete cells which is important for  
103 modeling events such as mutation and death. We model cell death as occurring stochastically to individuals  
104 at a probability determined by death rate. Changes in quantities of metabolites (Resource  $R$ , Byproduct  
105  $B$ , and Product  $P$ ) are due to release and/or consumption. Throughout the text, we use  $H$  and  $M$  to  
106 respectively represent the biomass of Helper and Manufacturer, and  $I_H$  and  $I_M$  to respectively represent the  
107 integer cell number of Helper and Manufacturer.  $R$ ,  $B$ , and  $P$  respectively represent the amount of Resource  
108 (in unit of  $\tilde{R}(0)$ , initial Resource in Newborn), Byproduct (in unit of  $\tilde{r}_B$ , the amount of Byproduct released  
109 per H biomass produced), and Product (in unit of  $\tilde{r}_P$ , the amount of Product released at the cost of one  
110 M biomass). “ $\sim$ ” marks scaling factors, and rationales of scaling can be found in Methods Section 1. At a  
111 given maturation time  $T$  and initial Resource, community function  $P(T)$  depends on *Newborn composition*,  
112 which is in turn defined by initial total biomass  $N(0)$ , the biomass fraction of Manufacturer  $\phi_M(0)$ , and the  
113 relative abundance of various H and M genotypes and phenotypes (see Methods Section 1).

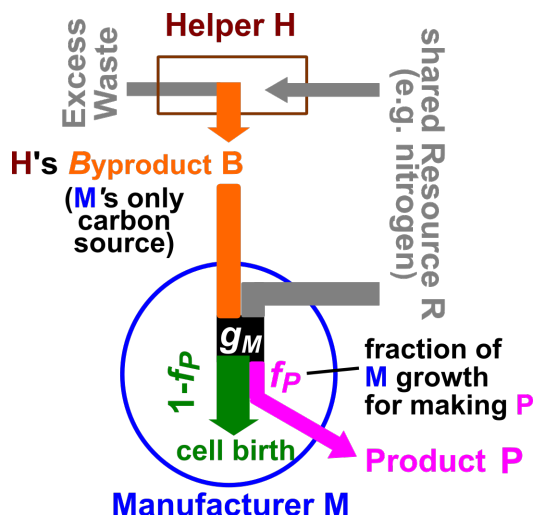

Figure 2: **Figure 2. A Helper-Manufacturer community that converts Waste to Product.** Helper H digests Waste (present in excess) to grow its biomass, and produces Byproduct B. B is the sole carbon source for Manufacturer M. M invests a fraction  $f_P$  of its potential growth  $g_M$  to make Product P, while channels the remaining  $1 - f_P$  to its own biomass growth. When  $f_P = 0$ , M makes no Product and its growth rate is  $g_M$ ; when  $f_P = 1$ , M uses all its resources to make Product and does not grow. H and M compete for a shared Resource R, and thus when R is depleted, cell growth stops. In this study, we assume that the release of Byproduct and Product is coupled to biomass growth.

114

## 115 Species coexistence in Helper-Manufacturer community

116 To convert Waste to Product, H and M must coexist. Coexistence can be achieved if at least one species  
 117 derives a large fitness benefit (when compared to its basal fitness) from the other species [45]. In the Helper-  
 118 Manufacturer community, Manufacturer obligatorily depends on Helper, and thus coexistence is possible.  
 119 However, if  $f_P$  is too high (e.g. near 1), then Manufacturer will always grow slower than Helper and therefore  
 120 go extinct (burgundy in the top panel of Figure 3A and in Figure 3B). At low  $f_P$ , if Byproduct from Helper  
 121 allows Manufacturer to grow faster than Helper for part of a maturation cycle  $T$ , then the two species can  
 122 coexist. Furthermore if species coexistence is achieved, then coexistence is stable in the sense that species  
 123 ratio will converge to a steady-state value (olive and green in the bottom panel of Figure 3A and in Figure  
 124 3B).

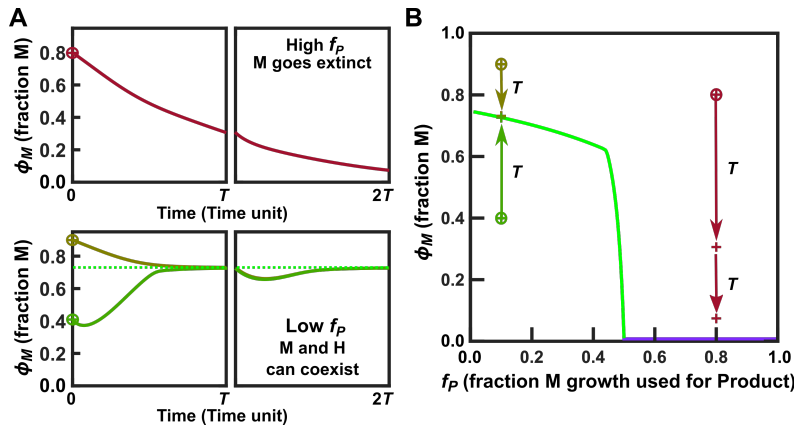

Figure 3: **Figure 3. Stable species coexistence at low  $f_P$ .** (A) Helper H and Manufacturer M fail to coexist when  $f_P$  is high (0.8; top). At low  $f_P$  (0.1, bottom), if M can grow faster than H for part of the maturation cycle  $T$ , then H and M can stably coexist: different initial species ratios will converge to a steady state value (dotted line). (B) Phase portrait showing steady state  $\phi_{M,SS}$  (light green and lavender) as a function of  $f_P$ . The dynamics trajectories in A are re-plotted in B. The initial state of a Newborn community is marked with  $\oplus$ , and each subsequent cross (+) along the arrow direction represents community state at the end of a maturation cycle  $T$ . Parameters are from the last column of Table 1.

## 125 Considerations for community selection

126 In this section, we discuss several important considerations for community selection. First, we choose H and  
 127 M phenotypes (Table 1) so that the two species can coexist for a range of  $f_P$  (Figure 3). Our parameter  
 128 values are biologically feasible based on experimental measurements on microbes (details in Methods Section  
 129 2).

130 Second, the rate of mutations. Experimentally-measured rates of phenotype-altering mutations can vary  
 131 from  $10^{-8}$  to  $10^{-3}$  per genome per generation depending on the phenotype of interest (e.g. a qualitative  
 132 phenotype such as survival under a stress, or a quantitative phenotype such as growth rate) and a variety  
 133 of other factors (Methods Section 4). Mutation rate can be further elevated by 100-fold in hyper-mutators  
 134 [46, 47, 48]. Here for any mutable phenotype, we assume a high, but biologically feasible, rate of 0.002  
 135 phenotype-altering mutations per cell per generation, in part to speed up computation. When we lower  
 136 mutation rate 100-fold, all of our conclusions still hold (see Figure 23).

137 Third, the phenotype spectrum of mutations (Methods Section 4; Figure 4B). Among phenotype-altering  
 138 mutations, we assume that 50% create null mutants (e.g. maximal growth rate  $g_{Species\ max} = 0$ , metabolite  
 139 affinity  $1/K_{Species\ Metabolite} = 0$ , or  $f_P = 0$ ), as per experimental studies on GFP, virus, and yeast [49, 50, 51].  
 140 Among not-null mutations, the fraction of mutations that enhance a phenotype (“enhancing mutations”) ver-  
 141 sus those that diminish a phenotype (“diminishing mutations”) is highly variable depending on, for example,  
 142 effective population size and the optimality of the starting phenotype (Methods Section 4). Reasoning that  
 143 a starting community is generally neither optimized nor thoroughly un-optimized, we model mutation effects  
 144 based on an *S. cerevisiae* study from the Dunham lab. This study quantified the fitness effects of a large  
 145 number of fitness-enhancing and fitness-diminishing mutants [52]. Our reanalysis of the Dunham lab data  
 146 shows that the distribution of mutation effect is largely conserved regardless of environmental conditions  
 147 (carbon-limitation, phosphate-limitation, or sulfate-limitation) or mutation types (single-copy gene deletion  
 148 in haploid or diploid; extra gene copies on low-copy or high-copy plasmids in diploid) (Figure 13). In all  
 149 cases, the relative fitness changes caused by fitness-enhancing and fitness-diminishing mutations can be ap-  
 150 proximated by separate exponential distributions with different means (Figure 4B). We further assume that  
 151 the effects of sequential mutations are multiplicative, i.e. there is no epistasis. When we use a different  
 152 distribution of mutation effect or incorporate various strengths of epistasis based on previous experimental  
 153 and theoretical work (Methods Section 6; Figure 14), our conclusions still hold (see Figures 24 and 25).

154 Fourth, the total number of communities  $n_{tot}$ . When  $n_{tot}$  gets larger, more variations become available

155 for selection, but experimental setup becomes more demanding. Here, we start with a modest number of  
156 100 Newborn communities which experimentally can be screened in 96-well plates.

157 Fifth, Newborn composition such as total biomass  $N(0)$  and fraction of Manufacturer biomass  $\phi_M(0)$ . If  
158  $N(0)$  (and thus the total population size) is very large, then all communities will share similar evolutionary  
159 dynamics of accumulating and being overtaken by fast-growing, non-producing Manufacturers. This makes  
160 higher-level selection (group selection and community selection) ineffective [15, 28, 53] (Figure 1B, top). On  
161 the other hand, if  $N(0)$  (and thus the total population size) is very small, then a member species could be  
162 lost by chance. Moreover, to sample rare mutations, a very large number of communities would be required.  
163 We have chosen  $N_0$  (the target biomass of a Newborn community) to be 100 (e.g. 100 cells of biomass 1).  
164 As for species ratio, it will rapidly converge to the steady state (Figure 3) which may or may not be optimal  
165 for community function (see the accompanying article).

166 Sixth, maturation time  $T$  and Resource supplied to Newborn, which together determine the number of  
167 cell generations within a selection cycle. The number of generations should be sufficiently large to allow  
168 new mutations to occur, but sufficiently short because otherwise, non-producers will eventually take over all  
169 communities, reducing heredity as well as variations among communities. We choose maturation time  $T$  such  
170 that the total biomass of even evolved communities comprising fastest-growing H and M would grow from the  
171 initial  $\sim 100$  biomass to at most  $9.9 \times 10^3$  when  $f_P = 0$ , and generally to  $\sim 7 \times 10^3$  for  $f_P$  normally encountered  
172 during community selection. At the mutation rate of  $2 \times 10^{-3}$  per cell per generation, a community growing  
173 from  $\sim 10^2$  to  $\sim 10^4$  ( $\sim 6 - 7$  generations) samples a handful of mutations on average. We supply each  
174 Newborn community with Resource so that a maximal total biomass of  $10^4$  can be supported. For an average  
175 community, this choice ensures a good ( $\sim 70\%$ ) usage of Resource, and the excess (30%) Resource prevents  
176 stationary phase and its physiological complications (e.g. sporulation).

177 Finally, community reproduction. Here, we do not allow mixing (migration) among communities to  
178 prevent non-producers from migrating to high-functioning communities. If we select a large percent of Adult  
179 communities to reproduce, then community selection is too weak. If we select a small number of Adult  
180 communities to reproduce, then variations among the next-generation Newborns could be limited. However,  
181 since we use hyper-mutators, we are not as concerned about a shortage of variations. Thus, we choose the  
182 top-functioning Adult community and reproduce it by randomly partitioning it into Newborns to achieve  
183 an average biomass of  $N_0 = 100$ . Since total biomass (or population size) generally increases by  $\sim 70$  fold  
184 during maturation but we need 100  $n_{tot}$  Newborn communities, we use the top-functioning Adult community  
185 to reproduce as many Newborns as possible, and then use the second top-functioning Adult community to  
186 generate the remaining Newborns.

187 To summarize (Figure 4), we start with  $n_{tot}$  of 100 Newborns. Each Newborn starts with  $N(0)$  of 100  
188 biomass units, and  $H : M$  ratio converges to a steady state value (Figure 3). Each Newborn is supplied  
189 with excess Waste  $W$  and enough Resource to grow to a total biomass of  $10^4$ . To avoid stationary phase, we  
190 choose a maturation time  $T$  so that even the fastest-growing community on average would not deplete  $R$  by  
191 the end of a selection cycle. Phenotype-altering mutations occur at a rate of 0.002 per cell per generation  
192 for each mutable phenotype (Table 1). A mutation can create a null mutant (probability = 0.5), or enhance  
193 a phenotype by an average of 5% (probability  $\sim 0.25$ ), or diminish a phenotype by an average of 6.7%  
194 (probability  $\sim 0.25$ ). The effects of sequential mutations are multiplicative. At the end of a cycle, Adult  
195 with the highest  $P(T)$  is selected and randomly partitioned into as many Newborns as possible, and these  
196 Newborns on average have a target biomass of  $N_0 = 100$ . When the top-functioning Adult is exhausted, the  
197 second highest-functioning community is used until  $n_{tot}$  of 100 Newborns are generated for a new cycle. As  
198 a control, we randomly choose Adult communities to reproduce in a similar fashion.

## 199 Improving individual growth sometimes improves community function

200 To simulate community selection, we allow mutations to change mutable phenotypes so that phenotypes range  
201 between zero (null mutants) and respective biological upper bounds (Table 1). Mutable phenotypes include  
202 M's production parameter  $f_P$  (ranging from 0 to 1), as well as H and M's growth phenotypes (maximal growth  
203 rates and affinities for nutrients). Species phenotypes and their upper bounds are biologically reasonable (see  
204 Methods Section 2 for experimental justifications), and also allow evolved H and M to coexist for a range  
205 of  $f_P$  (Figure 3B). These mutable phenotypes have been shown to rapidly evolve (within tens to hundreds

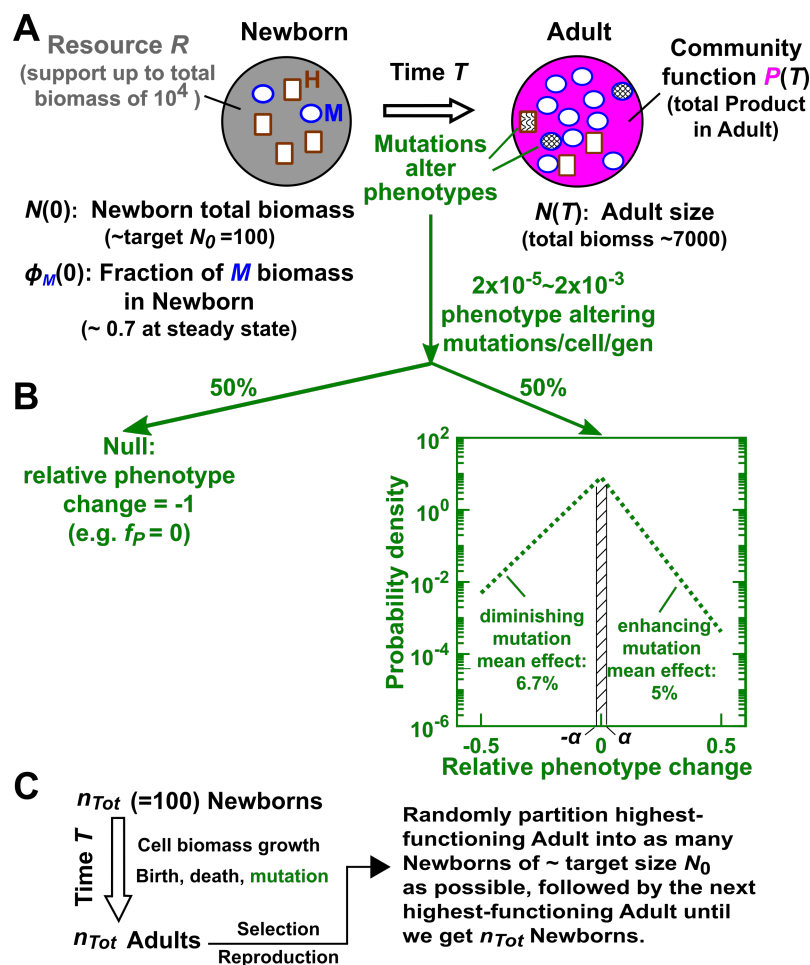

Figure 4: **Figure 4. Selection on community function.** (A) Definition of community function. (B) The distribution of relative phenotype change due to a mutation, as inferred from the Dunham lab data (see Figure 13 for full figure). For example in the case of  $f_P$ , 0.5 on the  $x$ -axis means  $(f_{P,mut} - f_{P,anc}) / f_{P,anc} = 0.5$ . The probability of a mutation altering the relative phenotype by  $\pm\alpha$  is the shaded area. See Figure 14 for how we model phenotypic effects of mutations under epistasis. (C) Summary of community selection simulations.



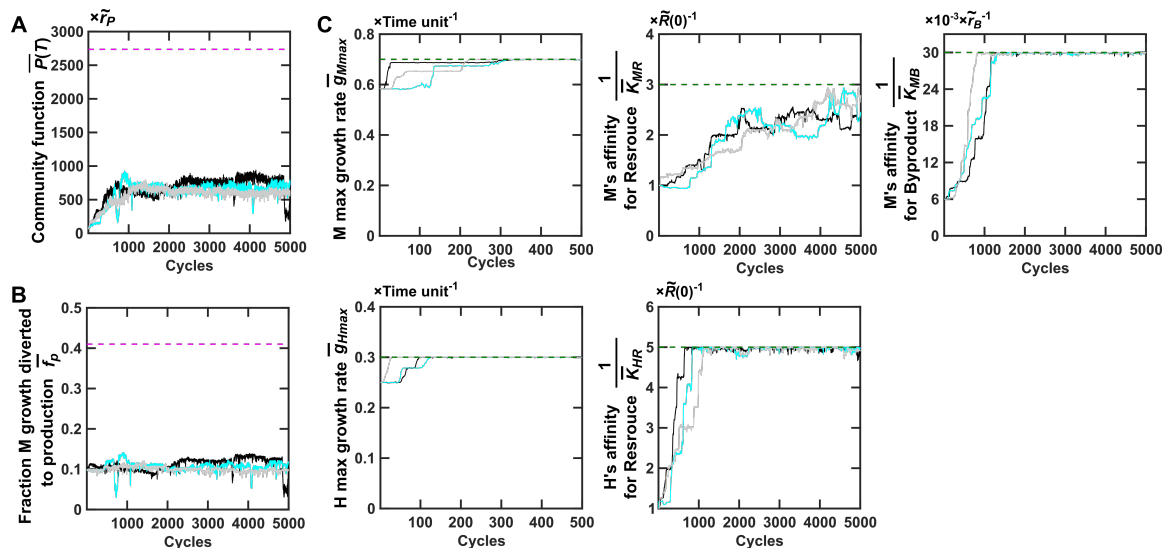

Figure 5: **Figure 5. Improved community function can be accompanied by improved individual growth.** Upon community selection, community function  $P(T)$  increases (A). This increase is accompanied by improved individual growth (improved maximal growth rates  $g_{Mmax}$  and  $g_{Hmax}$  and affinities for metabolites  $1/K_{MR}$ ,  $1/K_{MB}$  and  $1/K_{HR}$ ) (C). However,  $f_P$  increases very little (B).  $\bar{P}(T)$  is averaged across the two selected Adult communities.  $\bar{g}_{Mmax}$ ,  $\bar{g}_{Hmax}$ , and  $\bar{f}_P$  are obtained by averaging within each selected Adult community and then averaging across the two selected Adults.  $K_{SpeciesMetabolite}$  are averaged within each selected Adult community, then averaged across the two selected Adults, and finally inverted to represent average affinity. Green dashed lines: upper bounds of phenotypes; Magenta dashed lines:  $f_P$  optimal for community function, and maximal  $P(T)$  when all five growth parameters are fixed at their upper bounds and  $\phi_M(0)$  is also optimal for  $P(T)$ . Black, cyan, and gray curves show three independent simulations.

of generations; [54, 55, 56, 57]). We hold death rates constant because they are much smaller than growth rates and thus any changes are likely to be inconsequential. We hold consumption coefficients ( $c_{RH}$ ,  $c_{RM}$ ,  $c_{BM}$ ) constant because the amounts of essential elements required to make biomass are unlikely to evolve dramatically due to stoichiometric constraints, especially when these elements are not supplied in large excess ([58]).

In control simulations where random communities are selected for reproduction, community function rapidly declines to zero in all replicates (Figure 15C). This is expected since in the absence of community selection, natural selection favors fast-growing non-producers ( $f_P = 0$ ; Figure 15B). Consistent with natural selection, maximal growth rates rapidly increase to their upper bounds, and nutrient affinities also improve (Figure 15A).

When we apply community selection, community function  $P(T)$  initially increases (Figure 5A). Concurrently, H and M's maximal growth rates and nutrient affinities improve toward their respective upper bounds (green dashed lines in Figure 5C).  $f_P$  does not decline, but it fails to increase even though a higher  $f_P$  would have led to a higher community function (magenta dashed lines in Figure 5A and B).

These dynamics suggest that if  $f_P$  is prevented from declining, then improving individual fitness may improve community function. Of course, this is not always true. For example, if H evolves to always grow faster than M, then H will out-compete M and community function will decline. Here, we want to fix all growth parameters (maximal growth rates and nutrient affinities) at their evolutionary upper bounds, which will allow us to simplify our model and visualize community function landscape (accompanying article). Thus, we have deliberately chosen parameters such that improving H and M's growth parameters will generally improve community function (Methods Section 3; Figures 16 and 17). Consequently, mutations that reduce growth parameters will be selected against by both natural selection and community selection. Even in the one exceptional case where M's lower affinity for R (lower  $1/K_{MR}$ ) leads to improved M growth but lower community function when  $f_P$  is low (Figure 18), whether or not fixing the particular parameter ( $1/K_{MR}$ ) at

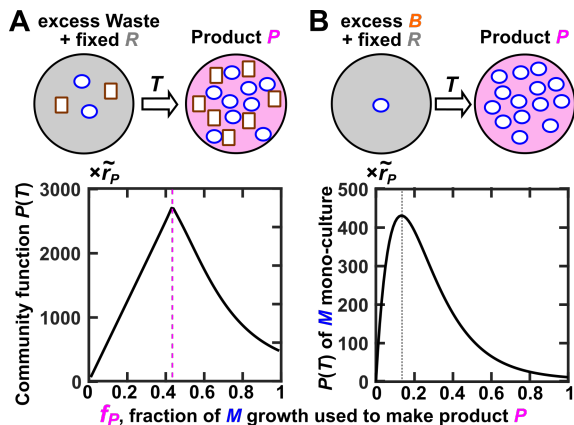

Figure 6:  $f_P$  optimal for monoculture production may differ from  $f_P$  optimal for community production. (A) For a Newborn H-M community supplied with a fixed Resource and excess Waste, optimal community function  $P(T)$  is achieved at an intermediate  $f_P^* = 0.41$  (magenta dashed line). Here the Newborn community has 60  $M$  and 40  $H$  cells of biomass 1, which is also the starting point of our community selection simulation. The growth parameters of  $M$  and  $H$  are all fixed at their upper bounds. (B) Consider a Newborn group starting with a single Manufacturer with its  $g_{Mmax}$  and  $1/K_{MR}$  fixed at their upper bounds. Besides the same amount of Resource, we will need to supply Byproduct B. Experimentally, it will be difficult to supply B in a manner that mimics the community environment. If we supply excess B, maximal group function is achieved at an intermediate  $f_P = 0.13$  (grey dotted line).

its upper bound does not affect community selection dynamics (Figure 26). From here on, unless otherwise stated, we fix all growth parameters at their upper bounds.

## Maximal community function is achieved at an intermediate $f_P$

Ideally, we would like to compute global maximal  $P(T)$  to test whether it can be achieved via community selection. However, given the nonlinear equations in our model (Methods Section 1), identifying global maximal can be mathematically challenging<sup>5</sup>. Instead, we heuristically search for a locally maximal  $P(T)$  which may or may not be globally maximal but is experimentally accessible.

As discussed above, in our system we can fix all growth parameters at their upper bounds to improve community function (Methods Section 3). In this simplified scenario, for Newborn size  $N(0) = 100$ , we can identify  $f_P$  and  $\phi_M(0)$  combination ( $f_P^* = 0.41$  and  $\phi_M^*(0) = 0.54$ ) that realizes maximal community function  $P^*(T)$  (Methods, Section 8). For any  $\phi_M(0)$ , an intermediate  $f_P$  value maximizes community function (Figure 6A). This is not surprising: at zero  $f_P$ , no Product is made; at high  $f_P$ , Helper outcompetes Manufacturer. Importantly, the maximal  $P^*(T)$  identified above cannot be further improved if we allow all growth and production parameters to mutate (Figure 19). Thus, this  $P^*(T)$  is locally maximal.

## $f_P$ optimal for monoculture function may not be optimal for community function

Experimentally, how might we achieve optimal  $P^*(T)$  discussed above? We can pre-adapt  $H$  via natural selection by growing  $H$  in a Resource-limited chemostat so that fastest growers dominate. If maximal growth rate and Resource affinity are independent (i.e. no trade-offs), then both will approach their upper bounds.

<sup>5</sup>Applied Mathematician Professor Hong Qian (University of Washington) states, "Without a closed-form solution, rigorously proving global optimum is difficult and remains an open question. Pure mathematicians may go as far as telling you the existence and uniqueness of such a solution. Applied mathematicians will forego rigor a little bit, and will come up with a "heuristic" algorithm that is usually better than brute-force parameter scans. Consequently, they can almost be sure that there is a global optimum (or not)."

249 For M, natural selection will yield zero  $f_P$ . Instead, we can attempt group selection to obtain high-  
 250 production M monocultures. Specifically, we start with  $n_{tot}$  of 100 Newborn groups, each starting with one  
 251 M cell to facilitate group selection (Figure 1B bottom panel, [27]). We supply Newborn groups with the  
 252 same amount of Resource as we supply Newborn communities. Since it is difficult to reproduce community  
 253 Byproduct dynamics in M monocultures, for simplicity, we supply excess Byproduct to Newborn groups.  
 254 Consequently, M's affinity for B ( $1/K_{MB}$ ) cannot be selected. When we select for high group function  
 255  $P(T)$ , maximal growth rate  $g_{Mmax}$  and M's affinity for Resource  $1/K_{MR}$  both reach their evolutionary  
 256 upper bounds, and  $f_P$  gradually increases to 0.13 (Figure 20), consistent with our calculations (Figure 6B).  
 257 As expected,  $f_P$  optimal for group production occurs at an intermediate value (Figure 6B): at zero  $f_P$ ,  
 258 production is zero; at  $f_P = 1$ , M cannot grow and may even die, and thus group function is low.

259 To experimentally improve M's affinity for Byproduct, we can evolve ancestral M in Byproduct-limited  
 260 chemostat where we expect  $g_{Mmax}$  and  $1/K_{MB}$  to reach their upper bounds and  $f_P$  to decline to zero.  
 261 We can then identify mutations that improve  $1/K_{MB}$ , and engineer them into the above group-selected M  
 262 (assuming that mutations exert independent effects). We thus obtain mono-optimized M where all growth  
 263 parameters are at upper bounds and  $f_P$  is optimal for M group function.

264  $f_P$  optimal for group function is lower than that for community function (Figure 6)<sup>6</sup>. Natural selection  
 265 will reduce  $f_P$ . Can we perform community selection to counter natural selection so that  $f_P$  and community  
 266 function will increase?

## 267 Community function fails to improve due to non-heritable variations

268 Starting with Newborn communities of mono-optimized H and M, we simulate artificial community selection  
 269 (Figure 4; Methods Section 5). We keep all five growth parameters fixed at their upper bounds, and only allow  
 270  $f_P$  to mutate as communities mature. We select Adult communities with the highest functions, and reproduce  
 271 them by partitioning them into Newborns with target total biomass  $N_0$  (Figure 4C). Experimentally, this is  
 272 equivalent to calculating the fold-dilution by dividing  $N(T)$  (the turbidity of an Adult community) by target  
 273  $N_0$  (the target turbidity of a Newborn), and performing this dilution by pipetting a small volume of the  
 274 Adult community into fresh medium (Methods Section 5). In this selection regimen, total biomass  $N(0)$  and  
 275 fraction of M biomass  $\phi_M(0)$  fluctuate stochastically<sup>7</sup>.  $\bar{f}_P$  barely increases and remains far below optimum  
 276 (Figure 7A), similar to what we have observed earlier (Figure 5). Consequently, community function  $P(T)$   
 277 also remains far below optimum (Figure 7B).

278 To investigate the reason for this lack of improvement, we examine correlation between  $P(T)$  and Newborn  
 279 composition (in terms of  $\bar{f}_P(0)$ , total biomass  $N(0)$ , and fraction of M biomass  $\phi_M(0)$ ) during one round  
 280 of selection (Figure 8).  $P(T)$  should ideally depend on  $\bar{f}_P(0)$  whose variations are partially heritable since  
 281 Newborns sample subsets of  $f_P$  in the Adult community. However, we observe little correlation between  $P(T)$   
 282 and  $\bar{f}_P(0)$  (Figure 8A). For example, the Adult community displaying the highest function (left magenta  
 283 dot) has a below-median  $\bar{f}_P(0)$ . Instead, we observe a strong correlation between  $P(T)$  and  $N(0)$ , and  
 284 between  $P(T)$  and  $\phi_M(0)$  (Figure 8B-C).

285 The reason for strong correlations between  $P(T)$  and  $N(0)$  and between  $P(T)$  and  $\phi_M(0)$  becomes clear  
 286 when we examine community dynamics. To minimize stationary phase, we have chosen maturation time  $T$   
 287 so that a typical community depletes the majority but not all of the Resource R. A community begins with  
 288 abundant Resource and no Byproduct, so H will grow first and release Byproduct. After Byproduct has  
 289 accumulated to a level comparable to M's affinity for Byproduct, M will start to grow. When a community  
 290 starts with a higher-than-average  $N(0)$  (dotted lines in top panels of Figure 27), M will grow to a higher  
 291 biomass, deplete Resource more thoroughly, and make more Product. Similarly, if a community starts with  
 292 a lower-than-average  $\phi_M(0)$  (dotted lines in bottom panels of Figure 27), it will have a higher-than-average

<sup>6</sup>To see why this is true, we note that M grows faster in monoculture than in community, because Byproduct is in excess in monoculture whereas in community, H-supplied Byproduct is initially limiting. Thus,  $\int_T g_M dt$  is larger in monoculture than in community. According to Eq. 26 (Methods Section 7),  $f_{P*} = 1/\int_T g_M dt$  is smaller for monoculture than for community.

<sup>7</sup> $N(0)$  fluctuates with a standard deviation of  $\sqrt{E(N(0))} = \sqrt{N_0}$ . For  $\phi_M(0) = M(0)/N(0)$ ,  $\text{Var}(\phi_M(0)) = \left(\frac{E(M(0))}{E(N(0))}\right)^2 \left[ \frac{\text{Var}(M(0))}{(E(M(0)))^2} - 2\frac{\text{Cov}(M(0), N(0))}{E(M(0))E(N(0))} + \frac{\text{Var}(N(0))}{(E(N(0)))^2} \right] = \left(\frac{N_0 \phi_M(T)}{N_0}\right)^2 \left[ \frac{1}{N_0 \phi_M(T)} + \frac{1}{N_0} \right]$  where "E" means the expected value and "Var" means variance, and  $\phi_M(T)$  is the fraction of M biomass in the Adult community from which Newborns are generated. For detailed derivation, see [www.stat.cmu.edu/~hseltman/files/ratio.pdf](http://www.stat.cmu.edu/~hseltman/files/ratio.pdf). Thus,  $\phi_M(0)$  fluctuates with a standard deviation of  $\phi_M(T)\sqrt{1/(N_0\phi_M(T)) + 1/N_0}$ .

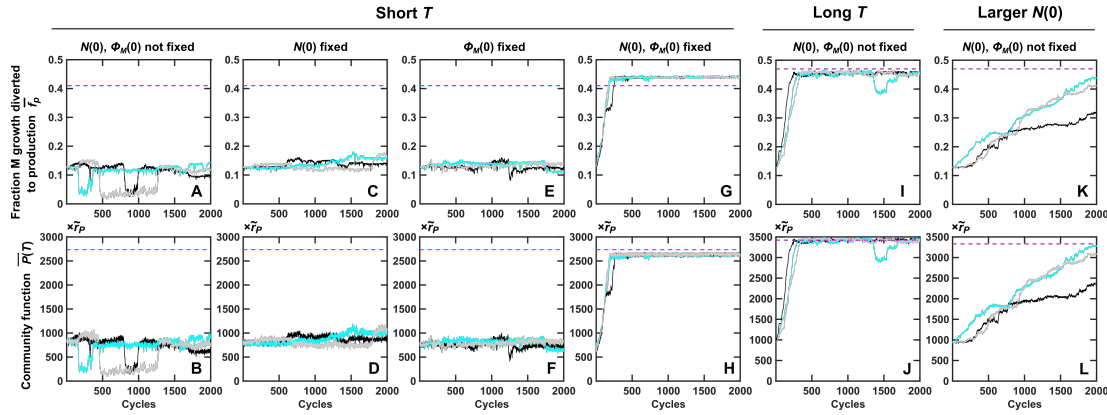

**Figure 7. Evolutionary dynamics of community selection depends on how we reproduce Adult communities.** (A-H) Communities of mono-adapted H and M are selected for high  $P(T)$  at short  $T$  ( $T=17$ , where on average the majority, but not all, Resource is consumed by the end of  $T$  to avoid stationary phase). (A, B)  $N(0)$  and  $\phi_M(0)$  are allowed to fluctuate around target total biomass of  $N_0 = 100$  and  $\phi_M(T)$  of the previous cycle, which is experimentally similar to diluting a volume of Adult community to fresh medium. (G, H)  $N(0)$  and  $\phi_M(0)$  are fixed to  $N_0 = 100$  and  $\phi_M(T)$  of the previous cycle, which is experimentally similar to sorting a fixed H and M biomass from selected Adults to Newborns. This allows community function to improve. (C-F) Fixing either  $N(0)$  or  $\phi_M(0)$  does not significantly improve community selection. (I-L) Communities of mono-adapted H and M are selected for high  $P(T)$  at target  $N_0 = 100$  and longer  $T = 20$  (I-J), or at a larger target  $N_0 = 160$  and short  $T = 17$  (K-L). In both cases, on average Resource is depleted by the end of  $T$ . Thus, “unlucky” communities with lower  $N(0)$  and/or higher  $\phi_M(0)$  will have a chance to catch up. Consequently, fluctuations in  $N(0)$  and  $\phi_M(0)$  do not significantly affect  $P(T)$ , and community function improves under selection even without fixing  $N(0)$  and  $\phi_M(0)$ .  $\bar{f}_P(T)$  are obtained by averaging within each selected Adult community and then averaging across the two selected Adults.  $\bar{P}(T)$  are averaged across the two selected Adults. Magenta dashed lines:  $f_P^*$  optimal for  $P(T)$  and maximal  $P^*(T)$  when all five growth parameters are fixed at their upper bounds and  $\phi_M(0)$  is at  $\phi_M^*(0)$ . Black, cyan and grey curves are three independent simulations.

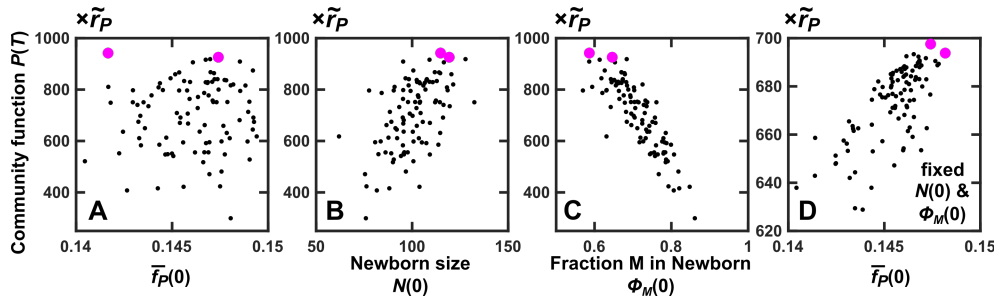

**Figure 8. Community function strongly correlates with Newborn total biomass and fraction of Manufacturer biomass.** (A-C) Nonheritable Poissonian fluctuations in  $N(0)$  and  $\phi_M(0)$  during community reproduction cause large variations in community function  $P(T)$ . In contrast, community function only weakly correlates with  $\bar{f}_P(0)$ , whose variations are partially heritable. Consequently, selected communities (magenta dots) may not have the highest  $\bar{f}_P(0)$ . (D) When both  $N(0)$  and  $\phi_M(0)$  are fixed,  $P(T)$  strongly correlates with  $\bar{f}_P(0)$ . Each dot represents one community.

293 fraction of Helper. Consequently, M will endure a shorter growth lag, grow to a higher biomass, deplete  
294 Resource more thoroughly, and make more Product. Thus, random fluctuations in Newborn biomass  $N(0)$   
295 and species composition  $\phi_M(0)$  during community reproduction can lead to large non-heritable variations in  
296 community function such that communities with the highest average  $f_P$  may not get selected (Figure 8A).

## 297 Reducing non-heritable variations enables community function to 298 improve

299 Random fluctuations in Newborn biomass  $N(0)$  and species composition  $\phi_M(0)$  create non-heritable variati-  
300 ons in community function (Figure 8). Reducing non-heritable variations should enable community selection  
301 to work. Indeed, if we fix both  $N(0)$  and  $\phi_M(0)$  (Methods, Section 5), equivalent to experimentally flow-  
302 sorting a fixed biomass of H and M (based on for example cell fluorescence intensity) into each Newborn,  
303 then community function becomes strongly correlated with  $\bar{f}_P(0)$  (Figure 8D). Furthermore, both  $\bar{f}_P$  and  
304  $P(T)$  improve (Figure 7, G and H). In this particular case,  $\bar{f}_P$  overshoots  $f_{P^*}$  and consequently, maximal  
305  $P(T)$  is not achieved (see accompanying article for an explanation). Community function improvement is  
306 not seen if either  $N(0)$  or  $\phi_M(0)$  is non-fixed (Figure 7, C-F). Community function also improves (Figure 22)  
307 if we distribute fixed H and M cell numbers (instead of biomass) into each Newborn community (Methods,  
308 Section 5), which can be realized experimentally by flow sorting.

309 Alternatively, we can reduce non-heritable variations in  $P(T)$  by extending maturation time  $T$  or incre-  
310 asing  $N(0)$  so that an average community will deplete Resource by  $T$ . In this selection regimen, Newborn  
311 communities will still experience Poissonian fluctuations in  $N(0)$  and  $\phi_M(0)$  during community reproduction.  
312 However, those “unlucky” communities with smaller-than-average  $N(0)$  and/or larger-than-average  $\phi_M(0)$   
313 will have time to “catch up” as the “lucky” communities wait in stationary phase after exhausting Resource.  
314 Indeed, community function improves without having to fix  $N(0)$  or  $\phi_M(0)$  (Figure 7, I-L). In practice,  
315 these selection regimens will only be effective if variations in stationary phase duration introduce minimal  
316 non-heritable variations in community function.

317 In summary, community function improves under selection if we suppress non-heritable variations in  
318 community function. This conclusion holds when we lower the mutation rate by 100-fold (Figure 23), or use  
319 a different distribution of mutation effect (Figure 24). We have also tested the effect of epistasis (Methods,  
320 Section 6) where the effect of a mutation on  $f_P$  depends on the current  $f_P$  (Figure 14): If current  $f_P$  is high  
321 (e.g. 0.40) compared to the starting  $f_P$  (0.13, Figure 6B), then an enhancing mutation exerts a lesser effect  
322 and a diminishing mutation exerts a larger effect compared to when there is no epistasis. Conversely, if  
323 current  $f_P$  is low (e.g.  $f_P = 0.04$ ), then the opposite is true. Under different epistasis strengths, community  
324 function improvement can be sped up by reducing non-heritable variations in  $P(T)$  (Figure 25).

## 325 Discussion

326 How might we improve functions of multi-species microbial communities? We can enrich for the appropriate  
327 species combination. For example, using cellulose as a main carbon source enriches for communities of  
328 microbes that work together to degrade cellulose [2]. However, if we solely rely on species combinations to  
329 improve community function, then without a constant influx of new species, community function will likely  
330 stop improving [36].

331 Here, we consider artificial selection of communities with defined member species. The conventional  
332 wisdom may suggest “you get what you select for”. But is this true? We have studied a Helper-Manufacturer  
333 community where community function is costly to Manufacturer. For community selection to be effective, we  
334 need to ensure that member species can stably coexist (Figure 3). Improving individual fitness can sometimes  
335 improve community function (Figures 5 and 17), although this often may not be true (Figure 16). Despite  
336 pre-optimizing member species in monocultures, community function may still be sub-maximal (Figure 6)  
337 due to the difficulty in recapitulating community dynamics in monocultures. Further improvements in  
338 community function can be achieved via artificial community selection, if performed properly.

339 Many aspects need to be taken into consideration when performing artificial community selection. It

340 is universally true that suppressing non-heritable variations in a trait will increase its selection efficacy.  
341 However, we show here that for community selection, large non-heritable variations in community function  
342 can readily arise via routine experimental procedures such as pipetting. For example, to avoid stationary  
343 phase, if we choose maturation time  $T$  such that Resource is in excess, then pipetting a volume of Adult  
344 community to seed a Newborn community can already introduce large, non-heritable variations in com-  
345 munity function (Figure 8B-C). These non-heritable variations in turn partially mask heritable variations  
346 in community function caused by mutations in  $f_P$  (Figure 8A). Consequently, community function  $P(T)$   
347 remains stagnant (Figure 7A-B). In contrast, if we fix both  $N(0)$  and  $\phi_M(0)$  (via cell sorting for example),  
348 then community function improves (Figure 7G-H). Similarly, if we extend maturation time  $T$  or increase  
349  $N(0)$  so that Resource will on average be depleted by the end of  $T$ , then community function also improves  
350 (Figure 7I-L). However, increasing  $T$  or  $N(0)$  creates variations in how much time each community spends in  
351 stationary phase, which in turn might generate non-heritable variations in community function. By the same  
352 reasoning, if Resource is in excess, then reproducing an Adult community via fixed-fold dilution (instead of  
353 diluting to a fixed total biomass or total cell number) will select for Newborn communities of larger and  
354 larger size instead of Newborn communities with higher and higher  $f_P$  (Methods, Section 9).

355 How does artificial selection on multi-species communities compare with artificial selection on mono-  
356 species groups? In both cases, Newborn size must not be too large and maturation time must not be too  
357 long, because otherwise, all entities will accumulate non-producers in a similar fashion. This undermines  
358 variation among entities as well as heredity of the entity trait. Community selection and group selection differ  
359 in at least two aspects. First, inter-species interactions in a community could drive species composition to a  
360 value sub-optimal for community function (accompanying article), and this problem does not exist for group-  
361 level selection<sup>8</sup>. Second, in group selection, when a Newborn group starts with a small number of individuals,  
362 a fraction of Newborn groups will show high similarity to the Newborn of the previous cycle (Figure 1B,  
363 bottom panel). This heredity facilitates group selection. In contrast, when a Newborn community starts  
364 with a small number of total individuals, stochastic fluctuations in Newborn community composition can be  
365 large and can interfere with community selection (Figure 7). In the extreme case, a member species can even  
366 get lost by chance. Even if a fixed number of cells from each species are sorted into Newborns, each Newborn  
367 will randomly sample a subset of genotypes in each member species. This reduces heredity and can interfere  
368 with selection<sup>9</sup>. If many communities are under selection, then rare communities can by chance sample a  
369 beneficial genotype from multiple species, and these beneficial genotypes rapidly rise to high frequency due  
370 to small  $N(0)$ . In this case, reduced heredity actually speeds up community function improvement. This  
371 bears resemblance to how sexual recombination affects evolutionary dynamics: sexual recombination reduces  
372 heredity, but when population size is large so that beneficial mutation supply is large, sexual recombination  
373 speeds up adaptation [60, 61, 62].

374 Microbes can coevolve with each other and with their host in nature [63, 64, 65]. This coevolution is  
375 mainly driven by natural selection. Might microbial community as a whole become a unit of selection in  
376 nature? Our work suggests that if selection for a costly microbial community function should occur in nature,  
377 then mechanisms for suppressing non-heritable variations in community function should be in place.

## 378 Methods

### 379 1 A mathematical model of the H-M community

380 Starting from initial conditions, the dynamics of a community comprising homogeneous H and M populations  
381 can be described by the following equations. Definitions and values of all parameters as well as definitions  
382 of scaling factors (marked by “~”) are in Table 1. Definitions of variables in our model and simulations are

<sup>8</sup>Here, we assume that individuals in a group do not differentiate into interacting subgroups (i.e. not like cyanobacteria where some cells are photosynthetic while other cells fix nitrogen [59]).

<sup>9</sup>In group selection, suppose that a Newborn group starts with a single cooperator and that the highest-functioning Adult group has accumulated 80% cheaters. Then in the next cycle, 20% groups will be initiated with a single cooperator like the previous Newborn group. In community selection, suppose that a Newborn community starts with a single cooperator from each of the two species and that in the highest-functioning Adult community, each species has accumulated 80% cheaters. Then, in the next cycle, only  $20\% \times 20\% = 4\%$  communities will be initiated with pure cooperators like the previous Newborn community.

383 in Table 2. Variables and parameters without hats will not be scaled further. After scaling (see below for  
 384 an explanation), scaling factors will become 1 and variables and parameters with hats will lose their hats.

385 First,  $M$  and  $H$ , the biomass of M and H, change as a function of growth and death,

$$\frac{dM}{dt} = g_M(\hat{R}, \hat{B})(1 - f_P)M - \delta_M M \quad (1)$$

$$\frac{dH}{dt} = g_H(\hat{R})H - \delta_H H \quad (2)$$

386 In these equations, according to Fig 9

$$g_H(\hat{R}) = g_{Hmax} \frac{\hat{R}}{\hat{R} + \hat{K}_{HR}}$$

387 is the Monod growth dynamics and  $g_M(\hat{R}, \hat{B})$  takes the form of the Mankad-Bungay model [43]:

$$g_M(\hat{R}, \hat{B}) = g_{Mmax} \frac{\hat{R}_M \hat{B}_M}{\hat{R}_M + \hat{B}_M} \left( \frac{1}{\hat{R}_M + 1} + \frac{1}{\hat{B}_M + 1} \right)$$

388 where  $\hat{R}_M = \hat{R}/\hat{K}_{MR}$  and  $\hat{B}_M = \hat{B}/\hat{K}_{MB}$ .

389 Second, Resource  $\hat{R}$  is consumed proportionally to the growth of M and H; Byproduct  $\hat{B}$  is released pro-  
 390 portionally to H growth and consumed proportionally to M growth; and Product  $\hat{P}$  is released proportionally  
 391 to the  $f_P$  fraction of M's growth diverted to make P.

$$\frac{d\hat{R}}{dt} = -\hat{c}_{RM}g_M(\hat{R}, \hat{B})M - \hat{c}_{RH}g_H(\hat{R})H \quad (3)$$

$$\frac{d\hat{B}}{dt} = \tilde{r}_B g_H(\hat{R})H - \hat{c}_{BM}g_M(\hat{R}, \hat{B})M \quad (4)$$

$$\frac{d\hat{P}}{dt} = \tilde{r}_P f_P g_M(\hat{R}, \hat{B})M \quad (5)$$

392 Our model assumes that a fixed amount of Byproduct or Product is generated per biomass produced,  
 393 which is a reasonable assumption given the stoichiometry of metabolic fluxes and has been experimentally  
 394 observed [66]. Products such as secondary metabolites may be released during stationary phase, and future  
 395 work will test whether variations in this assumption will change our conclusions. The initial conditions are  
 396 described by total biomass  $N(0) = M(0) + H(0)$ , the fraction of M biomass  $\phi_M(0) = M(0)/N(0)$ , and the  
 397 total amount of Resource supplied at the beginning of a selection cycle  $\tilde{R}(0)$ . The volume of a community  
 398  $V$  is set to be 1, and thus cell or metabolite quantities (which are considered here) are numerically identical  
 399 to cell or metabolite concentrations.

400 We scale Resource-related variable ( $\hat{R}$ ) and parameters ( $\hat{K}_{MR}$ ,  $\hat{K}_{HR}$ ,  $\hat{c}_{RM}$ , and  $\hat{c}_{RH}$ ) against  $\tilde{R}(0)$  (Re-  
 401 source supplied to Newborn), Byproduct-related variable ( $\hat{B}$ ) and parameters ( $\hat{K}_{MB}$  and  $\hat{c}_{BM}$ ) against  $\tilde{r}_B$   
 402 (amount of Byproduct released per H biomass born), and Product-related variable ( $\hat{P}$ ) against  $\tilde{r}_P$  (amount  
 403 of Product made at the cost of one M biomass). For biologists who usually think of quantities with units,  
 404 the purpose of scaling (and getting rid of units) is to reduce the number of parameters. For example, H  
 405 biomass growth rate can be scaled against initial Resource  $\tilde{R}(0)$ :

$$\begin{aligned} g_H(\hat{R}) &= g_{Hmax} \frac{\hat{R}}{\hat{R} + \hat{K}_{HR}} \\ &= g_{Hmax} \left( \frac{\hat{R}}{\tilde{R}(0)} \right) \bigg/ \left( \frac{\hat{R}}{\tilde{R}(0)} + \frac{\hat{K}_{HR}}{\tilde{R}(0)} \right) \\ &= g_{Hmax} \frac{R}{(R + K_{HR})} \\ &= g_H(R) \end{aligned}$$

406 where  $R = \hat{R}/\tilde{R}(0)$  and  $K_{HR} = \hat{K}_{HR}/\tilde{R}(0)$ . Thus, the unscaled  $g_H(\hat{R})$  and the scaled  $g_H(R)$  share identical  
 407 forms. The value of  $\tilde{R}(0)$  becomes irrelevant since all  $R$ -related terms are relative to  $\tilde{R}(0)$  and the initial  
 408 Resource has the value of 1 with no units. Similarly, since  $\hat{R}_M = \frac{\hat{R}}{\tilde{R}(0)} / \frac{\hat{K}_{MB}}{\tilde{R}(0)} = \frac{R}{K_{MB}} = R_M$  and  $\hat{B}_M =$   
 409  $\frac{\hat{B}}{\tilde{r}_B} / \frac{\hat{K}_{MB}}{\tilde{r}_B} = \frac{B}{K_{MB}} = B_M$ ,  $g_M(\hat{R}, \hat{B}) = g_M(R, B)$ . As another example, after scaling  $\hat{P}$  against  $\tilde{r}_P$ , we have

$$\begin{aligned} \frac{dP}{dt} &= \frac{d\hat{P}}{\tilde{r}_P dt} \\ &= f_P g_M(\hat{R}, \hat{B}) M \\ &= f_P g_M(R, B) M \end{aligned} \quad (6)$$

410 and thus parameter  $\tilde{r}_P$  is no longer necessary. Other scaled equations are:

$$\begin{aligned} \frac{dR}{dt} &= \frac{d\hat{R}/\tilde{R}(0)}{dt} \\ &= -\frac{\hat{c}_{RM}}{\tilde{R}(0)} g_M(\hat{R}, \hat{B}) M - \frac{\hat{c}_{RH}}{\tilde{R}(0)} g_H(\hat{R}) H \\ &= -c_{RM} g_M(R, B) M - c_{RH} g_H(R) H \end{aligned} \quad (7)$$

$$\begin{aligned} \frac{dB}{dt} &= \frac{d\hat{B}/\tilde{r}_B}{dt} \\ &= g_H(\hat{R}) H - \frac{\hat{c}_{BM}}{\tilde{r}_B} g_M(\hat{R}, \hat{B}) M \\ &= g_H(R) H - c_{BM} g_M(R, B) M \end{aligned} \quad (8)$$

$$\frac{dM}{dt} = g_M(R, B) (1 - f_P) M - \delta_M M \quad (9)$$

$$\frac{dH}{dt} = g_H(R) H - \delta_H H \quad (10)$$

411 We have not scaled time here, although time can also be scaled by, for example, the community maturation  
 412 time. Here, time has the unit of unit time (e.g. hr), and to avoid repetition, we often drop the time unit.

## 413 2 Parameter choices

414 H can grow on Resource alone. For ancestral H, we set  $g_{Hmax} = 0.25$ ,  $K_{HR} = 1$  (i.e.  $K_{HR}$  is one unit of  
 415  $\tilde{R}(0)$ ) and  $c_{RH} = 10^{-4}$ . This way, ancestral H can grow by about 10-fold by the end of  $T = 17$ . These  
 416 parameters are biologically realistic: time unit can be arbitrarily chosen, and if we choose hour as the unit,  
 417 then  $g_{Hmax}$  translates to a doubling time of 2.8 hrs. Furthermore, for a *lys- S. cerevisiae* strain with lysine as  
 418 Resource, Monod constant is  $\hat{K} = 1 \mu\text{M}$ , and consumption  $\hat{c}$  is 2 fmole/cell (Ref. [67], Figure 2 Source Data  
 419 1). Thus, if we choose 20  $\mu\text{L}$  as volume  $\hat{V}$  and 1  $\mu\text{M}$  as initial Resource concentration, then  $\tilde{R}(0) = 2 \times 10^4$   
 420 fmole. After scaling,  $K = \hat{K}\hat{V}/\tilde{R}(0) = 1$  and  $c = \hat{c}/\tilde{R}(0) = 10^{-4}$ .

421 To ensure the coexistence of H and M, M must grow faster than H for part of the maturation cycle. Thus,  
 422 i)  $g_{Mmax}$  must exceed  $g_{Hmax}$  (Figure 3) since we have assumed M and H to have the same affinity for R  
 423 (Table 1); ii) M's affinity for Byproduct ( $1/K_{MB}$ ) must be sufficiently large; and iii) Byproduct consumed  
 424 per Manufacturer  $c_{BM}$  must be sufficiently small so that growth of M can be supported by H. Thus for  
 425 ancestral M, we choose  $g_{Mmax} = 0.58$  (equivalent to a doubling time of 1.2 hrs). We set  $\hat{c}_{BM} = \frac{1}{3}$  units  
 426 of  $r_B$  (i.e.  $c_{BM} = \frac{1}{3}$ ). This means that Byproduct released during one H biomass growth is sufficient to  
 427 generate 3 M biomass, which is biologically achievable ([68, 69]). When we choose  $\hat{K}_{MB} = \frac{5}{3} \times 10^2$  units of



|                | Definition                                                                                      | Ancestral                                | Mono-adapted               |
|----------------|-------------------------------------------------------------------------------------------------|------------------------------------------|----------------------------|
| $\tilde{r}_B$  | amount of released $\hat{B}$ released per H biomass born                                        | scaling factor                           | no change                  |
| $\tilde{r}_P$  | amount of released $\hat{P}$ at the cost of one M biomass                                       | scaling factor                           | no change                  |
| $\tilde{R}(0)$ | initial amount of Resource in Newborn                                                           | scaling factor                           |                            |
| $f_P$          | fraction of M growth diverted to producing P                                                    | 0.03                                     | 0.13                       |
| $K_{MR}$       | fold of $\tilde{R}(0)$ at which $g_{Mmax}/2$ is achieved in excess B                            | 1                                        | 1/3*                       |
| $K_{MB}$       | amount of $\hat{B}$ at which $g_{Mmax}/2$ is achieved in excess R, scaled against $\tilde{r}_B$ | $\frac{5}{3} \times 10^2$                | $\frac{1}{3} \times 10^2*$ |
| $K_{HR}$       | fold of $\tilde{R}(0)$ at which $g_{Hmax}/2$ is achieved                                        | 1                                        | 1/5*                       |
| $g_{Mmax}$     | maximal biomass growth rate of M                                                                | 0.58/unit time                           | 0.7*                       |
| $g_{Hmax}$     | maximal biomass growth rate of H                                                                | 0.25/unit time                           | 0.3*                       |
| $\delta_M$     | death rate of M                                                                                 | $3.5 \times 10^{-3}$ /unit time          | no change                  |
| $\delta_H$     | death rate of H                                                                                 | $1.5 \times 10^{-3}$ /unit time          | no change                  |
| $c_{RM}$       | fraction of $\tilde{R}(0)$ consumed per M biomass born                                          | $10^{-4}$                                | no change                  |
| $c_{RH}$       | fraction of $\tilde{R}(0)$ consumed per H biomass born                                          | $10^{-4}$                                | no change                  |
| $c_{BM}$       | amount of $\hat{B}$ consumed per M biomass born, scaled against $\tilde{r}_B$                   | $\frac{1}{3}$                            | no change                  |
| $P_{mut}$      | mutation probability per cell division for each mutable phenotype                               | $2 \times 10^{-5} \sim 2 \times 10^{-3}$ |                            |

Table 1: Parameters for ancestral and mono-adapted H and M. For maximal growth rates, \* represents evolutionary upper bound. For  $K_{SpeciesMetabolite}$ , \* represents evolutionary lower bound, which corresponds to evolutionary upper bound for Species's affinity for Metabolite ( $1/K_{SpeciesMetabolite}$ ). In the text, we explain why we hold the remaining parameters constant during evolution.

| Symbols              | Definition                                                                             |
|----------------------|----------------------------------------------------------------------------------------|
| $M(t), H(t)$         | The biomass of M or H in a community at time $t$                                       |
| $N(t) = M(t) + H(t)$ | The total biomass in a community at time $t$                                           |
| $\phi_M(t)$          | The fraction of M biomass at time $t$                                                  |
| $N_0$                | Pre-set target total biomass of Newborns during community reproduction                 |
| $I_M(t), I_H(t)$     | The integer number of M or H cells in a community at time $t$                          |
| $\varphi_M(t)$       | The fraction of M individuals at time $t$                                              |
| $L_M(t), L_H(t)$     | The biomass (length) of an individual M or H cell at time $t$ , ranged between 1 and 2 |
| $P(t)$               | The amount of Product P in a community at time $t$ , scaled by $\tilde{r}_P$           |
| $R(t)$               | The amount of Resource R in a community at time $t$ , scaled by $\tilde{R}(0)$         |
| $B(t)$               | The amount of Byproduct B in a community at time $t$ , scaled by $\tilde{r}_B$         |
| $n_D$                | The integer fold of dilution when reproducing an Adult Community                       |
| $n_{tot}$            | Total number of communities under selection                                            |
| $T$                  | Community maturation time, corresponding to the duration of a selection cycle          |

Table 2: A summary of variables used in the simulation.

428  $\tilde{r}_B$  (i.e.  $K_{MB} = \frac{5}{3} \times 10^2$ ), H and M can coexist for a range of  $f_P$  (Figure 3). This value is realistic. For  
429 example, an evolved hypoxanthine-requiring *S. cerevisiae* strain achieved a Monod constant for hypoxanthine  
430 at 0.1  $\mu\text{M}$  and a doubling time of  $\tau_0 = 7$  hours when co-cultured with a hypoxanthine-overproducing strain  
431 (bioRxiv). If  $\hat{V} = 20 \mu\text{L}$  in our experiment, then  $\hat{K}_{MB}/\tilde{r}_B = \frac{5}{3} \times 10^2$  corresponds to an absolute release  
432 rate  $\tilde{r}_B = 0.1 \mu\text{M} \times 20 \mu\text{L} / (\frac{5}{3} \times 10^2) = 12$  fmole per cell biomass born = 12 fmole/(1 cell $\times$ 7 hr) $\approx$  1.7  
433 fmole/cell/hr, which is of the same order of magnitude as that for a lysine-overproducing yeast strain (up  
434 to 0.8 fmole/cell/hr, bioRxiv) and a leucine-overproducing strain (4.2 fmole/cell/hr [69]). Death rates  $\delta_H$   
435 and  $\delta_M$  are chosen to be 0.5% of the upper bound of maximal growth rate, which is within the ballpark of  
436 experimental observations (e.g. the death rate of a *lys-* strain in lysine-limited chemostat is 0.4% of maximal  
437 growth rate, bioRxiv).

438 Since the biomass of various microbes share similar compositions of elements such as carbon or nitrogen  
439 [58], we assume that H and M consume the same amount of R per new cell ( $c_{RH} = c_{RM}$ ). Since  $c_{RH} =$   
440  $c_{RM} = 10^{-4}$  after scaling against  $\tilde{R}(0)$ , the maximum yield is  $10^4$  biomass.

441 Growth parameters (maximal growth rates  $g_{Mmax}$  and  $g_{Hmax}$  and affinities for nutrients  $1/K_{MR}$ ,  $1/K_{MB}$ ,  
442 and  $1/K_{HR}$ ) and production parameter ( $f_P \in [0, 1]$ ) are allowed to change during evolution, since these  
443 phenotypes have been observed to rapidly evolve within tens to hundreds of generations ([54, 55, 56, 57]).  
444 For example, several-fold improvement in nutrient affinity [55] and  $\sim 20\%$  increase in maximal growth rate  
445 [57] have been observed in experimental evolution. Thus we allow affinities  $1/K_{MR}$ ,  $1/K_{HR}$ , and  $1/K_{MB}$   
446 to increase by 3-fold, 5-fold, and 5-fold respectively, and allow  $g_{Hmax}$  and  $g_{Mmax}$  to increase by  $\sim 20\%$ .  
447 These bounds also ensure that evolved H and M can coexist for  $f_P < 0.5$  (Figure 3B), and that Resource  
448 is on average not depleted by  $T$  to avoid cells entering stationary phase. Although maximal growth rate  
449 and nutrient affinity can sometimes show trade-off (e.g. [55]), for simplicity we assume here that they are  
450 independent of each other. We hold metabolite consumption ( $c_{RM}$ ,  $c_{BM}$ ,  $c_{RH}$ ) constant because conversion  
451 of essential elements such as carbon and nitrogen into biomass is unlikely to evolve quickly and dramatically,  
452 especially when these elements are not in large excess ([58]). Similarly, we hold the scaling factors  $\tilde{r}_P$  and  
453  $\tilde{r}_B$  constant, assuming that they do not change rapidly during evolution due to stoichiometric constraints of  
454 biochemical reactions. We hold death rates ( $\delta_M$ ,  $\delta_H$ ) constant because they are much smaller than growth  
455 rates in general and thus any changes are likely inconsequential.

### 456 3 Choosing growth parameters to simplify evolutionary modeling

457 Besides considerations in Section 1, we want to choose growth parameters so that improved cell growth  
458 (maximal growth rates and affinity for metabolites) improves community function. This way, we can assemble  
459 Newborn communities using mono-adapted H and M where all growth parameters are fixed at their respective  
460 evolutionary upper-bounds (which can be achieved via natural selection), while only allowing  $f_P$  to evolve.  
461 This simplifies our problem. As we will see in the accompanying article, this also enables us to visualize the  
462 community function landscape. It is important to note that improving individual growth does not always  
463 lead to improved community function (Figure 16).

464 We have chosen such a set of growth parameters and their evolutionary upper bounds. Let's first consider  
465 the case where  $f_P = 0.41$ , which corresponds to optimal community function (magenta dashed lines in Figure  
466 5 and Figure 6A). If we fix four of the five growth parameters to their upper bounds, then as the remaining  
467 growth parameter improves, both individual fitness and community function increase (magenta lines in  
468 Figure 17). Thus, if community function is already optimized, then deviations from growth parameter upper  
469 bounds are disfavored by both community selection and natural selection, and hence growth parameters are  
470 naturally fixed.

471 Now let's consider the case where  $f_P = 0.13$ , which is optimal for M-monoculture function (grey dotted  
472 line in Figure 6B) and thus our starting point for community selection. Community function and individual  
473 fitness generally increase as growth parameters improve (black dashed line in Figure 17 A-D and F-I). How-  
474 ever, at lower  $f_P$  (e.g. 0.13 corresponding to black dashed line in Figure 17 J and 0.1 corresponding to black  
475 solid line in Figure 18 A), individual fitness declines slightly when M's affinity for Resource ( $1/K_{MR}$ ) im-  
476 proves. This is equivalent to decreased affinity for the abundant nutrient improving growth rate. Transporter  
477 competition for membrane space [70] could lead to this result, since reduced affinity for abundant nutrient  
478 may increase affinity for rare nutrient.

479 Mathematically speaking, this is a consequence of the Mankad-Bungay model [43] (Figure 10 B). Let  
 480  $\dot{S}_1 = S_1/K_1$  and  $\dot{S}_2 = S_2/K_2$ . Then,

$$\begin{aligned} \frac{\partial g}{\partial K_1} &= \frac{\partial g}{\partial \dot{S}_1} \frac{\partial \dot{S}_1}{\partial K_1} = \frac{\partial \left[ g_{max} \frac{\dot{S}_1 \dot{S}_2}{\dot{S}_1 + \dot{S}_2} \left( \frac{1}{1 + \dot{S}_1} + \frac{1}{1 + \dot{S}_2} \right) \right]}{\partial \dot{S}_1} \frac{\partial \dot{S}_1}{\partial K_1} \\ &= g_{max} \frac{\dot{S}_1 \dot{S}_2}{(\dot{S}_1 + \dot{S}_2) K_1} \left( \frac{\dot{S}_1}{(1 + \dot{S}_1)^2} - \frac{\dot{S}_2}{\dot{S}_1 + \dot{S}_2} \left( \frac{1}{1 + \dot{S}_1} + \frac{1}{1 + \dot{S}_2} \right) \right) \end{aligned}$$

481 If  $\dot{S}_1 \ll 1 \ll \dot{S}_2$  (corresponding to limiting  $S_1$  and abundant  $S_2$ ),

$$\frac{\dot{S}_1}{(1 + \dot{S}_1)^2} - \frac{\dot{S}_2}{\dot{S}_1 + \dot{S}_2} \left( \frac{1}{1 + \dot{S}_1} + \frac{1}{1 + \dot{S}_2} \right) \approx \frac{\dot{S}_1}{(1 + \dot{S}_1)^2} - \frac{1}{1 + \dot{S}_1} = -\frac{1}{(1 + \dot{S}_1)^2} \quad (11)$$

482 and thus  $\partial g / \partial K_1 < 0$ . This is the familiar case where growth rate increases as the Monod constant decreases  
 483 (i.e. affinity increases). However, if  $\dot{S}_2 \ll 1 \ll \dot{S}_1$

$$\frac{\dot{S}_1}{(1 + \dot{S}_1)^2} - \frac{\dot{S}_2}{\dot{S}_1 + \dot{S}_2} \left( \frac{1}{1 + \dot{S}_1} + \frac{1}{1 + \dot{S}_2} \right) \approx \frac{1}{\dot{S}_1} - \frac{\dot{S}_2}{\dot{S}_1} \frac{1}{1 + \dot{S}_2} = \frac{1}{\dot{S}_1(1 + \dot{S}_2)} \quad (12)$$

484 and thus  $\partial g / \partial K_1 > 0$ . In this case, the growth rate decrease as the Monod constant decreases (i.e. affinity  
 485 increases).

486 In the case of M, let  $S_1$  represent R and let  $S_2$  represent B. Thus,  $K_1$  corresponds to  $K_{MR}$  and  $K_2$   
 487 corresponds to  $K_{MB}$ . At the beginning of each cycle, R is abundant and B is limiting (Eq. 12). Thus M  
 488 cells with lower affinity for R (higher  $K_{MR}$ ) will grow faster than those with higher affinity (Figure 18). At  
 489 the end of each cycle, the opposite is true (Figure 18). As  $f_P$  decreases, M has the capacity to grow faster  
 490 and the first stage becomes more important. Thus in the Mankad & Bungay model at low  $f_P$ , M can gain  
 491 higher overall fitness by lowering affinity for R (Figure 18).

492 Regardless, the decline in individual fitness is very slight and only occurs at low  $f_P$  at the beginning of  
 493 community selection, and thus may be neglected. Indeed, if we start all growth parameters at their upper  
 494 bounds, and perform community selection while allowing all parameters to vary (Figure 21), then M's affinity  
 495 for Resource ( $1/K_{MR}$ ) decreases somewhat, yet the dynamics of  $f_P$  is similar to when we only allow  $f_P$  to  
 496 change (compare Figure 21D with Figure 7A). Indeed, allowing both  $f_P$  and  $1/K_{MR}$  to evolve does not  
 497 change our conclusions as shown in Figure 26.

## 498 4 Mutation rate and phenotype spectrum

499 Among mutations, a fraction will be phenotypically neutral in that they do not affect the phenotype of  
 500 interest. For example, the vast majority of synonymous mutations are neutral [71]. Experimentally, the  
 501 fraction of neutral mutations is difficult to determine. Consider organismal fitness as the phenotype of  
 502 interest. Whether a mutation is neutral or not can vary as a function of effective population size, and selection  
 503 condition. For example, at low population size due to drift, a beneficial or deleterious mutation may not be  
 504 selected for or selected against, and is thus neutral with respect to selection [72, 73]. In addition, mutations  
 505 in an antibiotic-degrading gene can be neutral under low antibiotic concentrations, but deleterious under  
 506 high antibiotic concentrations [74]. When considering single mutations, a larger fraction of neutral mutations  
 507 is mathematically equivalent to a lower mutation rate. Here on, our ‘‘mutation rate’’ refers to the rate of  
 508 mutations that either enhance a phenotype (‘‘enhancing mutations’’) or diminish a phenotype (‘‘diminishing  
 509 mutations’’). For five of the mutable phenotypes in our model, enhancing mutations of maximal growth rate  
 510 ( $g_{Hmax}$  and  $g_{Mmax}$ ) and of nutrient affinity ( $1/K_{HR}$ ,  $1/K_{MR}$ ,  $1/K_{MB}$ ) enhance individual fitness (beneficial  
 511 mutations). In contrast, enhancing mutations in  $f_p$  diminish individual fitness (deleterious mutations).

512 Depending on phenotype, the rate of phenotype-altering mutations is highly variable. Mutations that  
 513 cause qualitative phenotypic changes (e.g. canavanine or 5-fluoroorotic acid resistance) occur at a rate of  
 514  $10^{-8} \sim 10^{-6}$  per genome per generation in bacteria and yeast [75, 76]. Mutations affecting quantitative traits

515 such as growth rate occur much more frequently. For example in yeast, mutations that increase growth  
 516 rate by  $\geq 2\%$  occur at a rate of  $\sim 10^{-4}$  per genome per generation (calculated from Figure 3 of [77]),  
 517 and deleterious mutations occurs at a rate of  $10^{-4} \sim 10^{-3}$  per genome per generation [51, 48]. If the  
 518 phenotype of interest encompasses growth rates in diverse abiotic environments, then most of single-gene  
 519 deletion mutations in *S. cerevisiae* alter phenotypes [78]. Moreover, mutation rate can be elevated by as  
 520 much as 100-fold in hyper-mutators [46, 47, 48]. Here, we assume a high, but biologically feasible, rate of  
 521 0.002 phenotype-altering mutations per genome per generation to speed up computation. We have also tried  
 522 100-fold lower mutation rate. As expected, evolutionary dynamics slows down, but all of our conclusions  
 523 still hold (Figure 23).

524 Among phenotype-altering mutations, tens of percent create null mutants, as illustrated by experimental  
 525 studies on protein, virus, and yeast [49, 50, 51]. Thus, we assume that 50% phenotype-altering mutations  
 526 are null (i.e.  $g_{Species\ max} = 0$ , or  $K_{Species\ Metabolite} = \infty$ , or  $f_p = 0$ ). Among non-null mutations, the relative  
 527 abundances of enhancing versus diminishing mutations are highly variable in different experiments. It can  
 528 be impacted by effective population size. For example, with a large effective population size, the survival  
 529 rate of beneficial mutations is 1000-fold lower due to clonal interference (competition between beneficial  
 530 mutations) [79]. The relative abundance of enhancing versus diminishing mutations also strongly depends  
 531 on the optimality of the starting phenotype [49, 74, 72]. For example with ampicillin as a substrate, the  
 532 TEM-1  $\beta$ -lactamase acts as a “perfect” enzyme. Consequently, mutations were either neutral or diminishing,  
 533 and few enhanced enzyme activity [74]. In contrast with a novel substrate such as cefotaxime, the enzyme  
 534 has undetectable activity. Thus, diminishing mutations were not detected and 2% of tested mutations were  
 535 enhancing [74].

536 Phenotypes of the ancestral community members are generally not so extreme that mutations are solely  
 537 diminishing or solely enhancing. Thus, we base our model on experimental studies where a large number  
 538 of enhancing and diminishing mutants have been quantified in an unbiased fashion. An example is a study  
 539 from the Dunham lab where the fitness effects of thousands of *S. cerevisiae* mutations were quantified under  
 540 various nutrient limitations [52].

541 Specifically for each nutrient limitation, the authors first measured  $\Delta s_{WT} = (w_{WT} - \bar{w}_{WT})/\bar{w}_{WT} =$   
 542  $w_{WT}/\bar{w}_{WT} - 1$ , the deviation in relative fitness of thousands of bar-coded wild-type control strains from the  
 543 mean fitness. Due to experimental noise,  $\Delta s_{WT}$  is distributed with zero mean and non-zero variance. Then,  
 544 the authors measured thousands of  $\Delta s_{MT}$ , each corresponding to the relative fitness change of a bar-coded  
 545 mutant strain with respect to the mean of wild-type fitness (i.e.  $\Delta s_{MT} = (w_{MT} - \bar{w}_{WT})/\bar{w}_{WT}$ ). From  
 546 these two distributions, we derive  $\mu_{\Delta s}$ , the probability density function (PDF) of mutation fitness effect  
 547  $\Delta s = \Delta s_{MT} - \Delta s_{WT}$  (see Figure 13A for an explanation), in the following manner.

548 First, we calculate  $\mu_m(\Delta s_{MT})$ , discrete PDF of mutant strain relative fitness change, with bin width  
 549 0.04. In other words,  $\mu_m(\Delta s_{MT}) = \text{counts in the bin of } [\Delta s_{MT} - 0.02, \Delta s_{MT} + 0.02] / \text{total counts}/0.04$   
 550 where  $\Delta s_{MT}$  ranges from  $-0.6$  and  $0.6$  which is sufficient to cover the range of experimental outcome. The  
 551 Poissonian uncertainty of  $\mu_m$  is  $\delta\mu_m(\Delta s_{MT}) = \sqrt{\text{counts per bin}/\text{total counts}/0.04}$ . Repeating this process  
 552 for wild-type collection, we obtain PDF of wild-type strain relative fitness  $\mu_w(\Delta s_{WT})$ . Next, from wild type  
 553  $\mu_w(\Delta s_{WT})$  and each  $\mu_m(\Delta s_{MT})$ , we derive  $\mu_{\Delta s}(\Delta s)$ , the PDF of  $\Delta s$  with bin width 0.04:

$$\mu_{\Delta s}(\Delta s = i \times 0.04) = 0.04 \times \sum_{j=-\infty}^{+\infty} \mu_w(j \times 0.04) \mu_m((i + j) \times 0.04). \quad (13)$$

554 assuming that  $\Delta s_{MT}$  and  $\Delta s_{WT}$  are independent from each other. Here,  $i$  is an integer from  $-15$  to  $15$ . The  
 555 uncertainty for  $\mu_{\Delta s}$  is calculated by propagation of error. That is, if  $f$  is a function of  $x_i$  ( $i = 1, 2, \dots, n$ ).

556 Then  $s_f$ , the error of  $f$ , is  $s_f^2 = \sum \left( \frac{\partial f}{\partial x_i} s_{x_i} \right)^2$  where  $s_{x_i}$  is the error or uncertainty of  $x_i$ . Thus,

$$\delta\mu_{\Delta s}(i) = 0.04 \times \sqrt{\sum_j \left[ (\delta\mu_w(j) \mu_m(i + j))^2 + (\mu_w(j) \delta\mu_m(i + j))^2 \right]} \quad (14)$$

557 where  $\mu_w(j)$  is short-hand notation for  $\mu_w(\Delta s_{WT} = j \times 0.04)$  and so on. Our calculated  $\mu_{\Delta s}(\Delta s)$  with error  
 558 bar of  $\delta\mu_{\Delta s}$  is shown in Figure 13B.

559 Our reanalysis demonstrates that distributions of mutation fitness effects  $\mu_{\Delta s}(\Delta s)$  are largely conserved  
 560 regardless of nutrient conditions and mutation types (Figure 13B). In all cases, the relative fitness changes

561 caused by beneficial (fitness-enhancing) and deleterious (fitness-diminishing) mutations can be approximated  
 562 by separate exponential distributions with different means  $s_+$  and  $s_-$ , respectively. After normalization to  
 563 have a total probability of 1, we have:

$$\mu_{\Delta s}(\Delta s) = \begin{cases} \frac{1}{s_+ + s_- (1 - \exp(-1/s_-))} \exp(-\Delta s/s_+) & \text{if } \Delta s \geq 0 \\ \frac{1}{s_+ + s_- (1 - \exp(-1/s_-))} \exp(\Delta s/s_-) & \text{if } -1 < \Delta s < 0 \end{cases} \quad (15)$$

564 We fit the Dunham lab haploid data (since microbes are often haploid) to Eq. 15, using  $\mu_{\Delta s}(i)/\delta\mu_{\Delta s}(i)$  as  
 565 the weight for non-linear least squared regression (green lines in Figure 13B). We obtain  $s_+ = 0.050 \pm 0.002$   
 566 and  $s_- = 0.067 \pm 0.003$ .

567 Interestingly, exponential distribution described the fitness effects of deleterious mutations in an RNA  
 568 virus significantly well [49]. Based on extreme value theory, the fitness effects of beneficial mutations are pre-  
 569 dicted to follow an exponential distribution [80, 81], which has gained experimental support from bacterium  
 570 and virus [82, 83, 84] (although see [85, 77] for counter examples). Evolutionary models based on exponential  
 571 distributions of fitness effects have shown good agreements with experimental data [79, 86].

572 We have also tried smaller average mutational effects based on measurements of spontaneous or chemically-  
 573 induced (instead of deletion) mutations. For example, the fitness effects of nonlethal deleterious mutations in  
 574 *S. cerevisiae* are mostly 1%~5% [51], and the mean selection coefficient of beneficial mutations in *E. coli* was  
 575 1%~2% [82, 79]. Thus, as an alternative, we choose  $s_+ = 0.02$ ;  $s_- = -0.02$ , and obtain similar conclusions  
 576 (Figure 24).

## 577 5 Simulation code of community selection cycle

578 In our simulation, cell mutation, cell death, and community reproduction are stochastic. All other processes  
 579 (biomass growth, cell division, and changes in chemical concentrations) are deterministic.

580 The code starts with a total of  $n_{tot} = 100$  Newborn communities with identical configuration:

- 581 • each community has 100 total cells of biomass 1. Thus, total biomass  $N(0) = 100$ .
- 582 • 40 cells are H. 60 cells are M with identical  $f_P$ . Thus,  $M(0) = 60$  and  $\phi_M(0) = 0.6$ .

583 In the beginning, a random number is used to seed the random number generator for each Newborn commu-  
 584 nity, and this number is saved so that the sequence of random numbers used below can be exactly repeated  
 585 for subsequent data analysis. The initial amount of Resource is 1 unit of  $\tilde{R}(0)$ , and the initial Byproduct is  
 586  $B(0) = 0$ . The cycle time is divided into time steps of  $\Delta\tau = 0.05$ .

587 Below, we describe in detail what happens during each step of  $\Delta\tau$ . During an interval  $[\tau, \tau + \Delta\tau]$ ,  
 588 biomass growth is continuous but birth and death are discrete. Death and Product release are calculated at  
 589 the end of each  $\Delta\tau$ . Resource  $R(t)$  and Byproduct  $B(t)$  between  $[\tau, \tau + \Delta\tau]$  are calculated by solving the  
 590 following equations between  $[\tau, \tau + \Delta\tau]$  with the initial condition  $R(\tau)$  and  $B(\tau)$  using the ode23s solver in  
 591 Matlab:

$$\frac{dR}{dt} = -c_{RM}g_M(R, B)M(\tau) - c_{RH}g_H(R)H(\tau) \quad (16)$$

$$\frac{dB}{dt} = g_H(R)H(\tau) - c_{BM}g_M(R, B)M(\tau) \quad (17)$$

595 where  $M(\tau)$  and  $H(\tau)$  are the biomass of M and H at time  $\tau$ , respectively. The solutions from Eq. 16 and  
 596 17 are used in the integrals below.

597 We track the phenotypes of every H and M cell which are rod-shaped organisms of a fixed diameter. Let  
 598 the biomass (length) of an H cell be  $L_H(\tau)$ . The continuous growth of  $L_H$  during  $\tau$  and  $\tau + \Delta\tau$  can be  
 599 described as

$$\frac{dL_H}{dt} = g_H(R)L_H$$

601 thus  $L_H(\tau + \Delta\tau)$  is

602

$$\ln \frac{L_H(\tau + \Delta\tau)}{L_H(\tau)} = \int_{\tau}^{\tau + \Delta\tau} g_H(R) dt$$

603 and

604

$$L_H(\tau + \Delta\tau) = L_H(\tau) \exp \left( \int_{\tau}^{\tau + \Delta\tau} g_H(R) dt \right). \quad (18)$$

605

606

Similarly, let the length of an M cell be  $L_M(\tau)$ . The continuous growth of M can be described as

607

$$\frac{dL_M}{dt} = (1 - f_P)g_M(R, B)L_M.$$

608

609

Thus during the interval  $[\tau, \tau + \Delta\tau]$ ,

610

$$\ln \frac{L_M(\tau + \Delta\tau)}{L_M(\tau)} = \int_{\tau}^{\tau + \Delta\tau} (1 - f_P)g_M(R, B) dt$$

611

Thus for an M cell, its length  $L_M(\tau + \Delta\tau)$  is

612

$$L_M(\tau + \Delta\tau) = L_M(\tau) \exp \left( \int_{\tau}^{\tau + \Delta\tau} (1 - f_P)g_M(R, B) dt \right) \quad (19)$$

613

From Eq. 9 and 6,

614

$$\frac{dP}{dt} = f_P g_M(R, B)M \sim \frac{f_P}{1 - f_P} \frac{dM}{dt}$$

615

and we get

616

$$P(\tau + \Delta\tau) = P(\tau) + \frac{f_P}{1 - f_P} (M(\tau + \Delta\tau) - M(\tau))$$

617

where  $M(\tau + \Delta\tau) = \sum L_M(\tau + \Delta\tau)$  is the sum of the lengths of all M cells.

618

619

To describe discrete death events, each H and M cell has a probability of  $\delta_H \Delta\tau$  and  $\delta_M \Delta\tau$  to die, respectively. This is simulated by assigning a random number between  $[0, 1]$  for each cell and those receive a random number less than  $\delta_H \Delta\tau$  or  $\delta_M \Delta\tau$  get eliminated. For surviving cells, if a cell's length  $\geq 2$ , this cell will divide into two cells with half the original length.

620

621

622

Each cell has a probability of  $P_{mut} = 0.002$  to acquire a mutation that changes each of its phenotype (Methods, Section 4). Without loss of generality, let's consider mutations in  $f_P$ . After mutation,  $f_P$  will be multiplied by  $(1 + \Delta f_P)$ , where  $\Delta f_P$  is determined as below.

623

624

625

First, a uniform random number  $u_1$  is generated. If  $u_1 \leq 0.5$ ,  $\Delta f_P = -1$ , which represents 50% chance of a null mutation ( $f_P = 0$ ). If  $0.5 < u_1 \leq 1$ ,  $\Delta f_P$  follows the distribution defined by Eq. 22 with  $s_+(f_P) = 0.05$  for  $f_P$ -enhancing mutations and  $s_-(f_P) = 0.067$  for  $f_P$ -diminishing mutations when epistasis is not considered (Methods, Section 4). In the simulation,  $\Delta f_P$  is generated via inverse transform sampling. Specifically,  $C(\Delta f_P)$ , the cumulative distribution function (CDF) of  $\Delta f_P$ , can be found by integrating Eq. 15 from -1 to  $\Delta f_P$ :

626

627

628

629

630

$$\begin{aligned} C(\Delta f_P) &= \int_{-1}^{\Delta f_P} \mu_{\Delta s}(x) dx \\ &= \begin{cases} \frac{s_-}{s_+ + s_- (1 - e^{-1/s_-})} (\exp(\Delta f_P/s_-) - \exp(-1/s_-)) & \text{if } \Delta f_P \leq 0 \\ 1 - \frac{s_+}{s_+ + s_- (1 - e^{-1/s_-})} \exp(-\Delta f_P/s_+) & \text{if } \Delta f_P \geq 0 \end{cases} \end{aligned} \quad (20)$$

631

The two parts of Eq. 20 overlap at  $C(\Delta f_P = 0) = s_-(1 - e^{-1/s_-}) / [s_+ + s_-(1 - e^{-1/s_-})]$ .

632 In order to generate  $\Delta f_P$  satisfying the distribution in Eq. 15, a uniform random number  $u_2$  between 0  
 633 and 1 is generated and we set  $C(\Delta f_P) = u_2$ . Inverting Eq. 20 yields

634

$$\Delta f_P = \begin{cases} s_- \ln(u_2(s_+ + s_-(1 - e^{-1/s_-}))/s_- + e^{-1/s_-}) & u_2 \leq \frac{s_-(1 - e^{-1/s_-})}{s_+ + s_-(1 - e^{-1/s_-})} \\ -s_+ \ln((1 - u_2)(s_+ + s_-(1 - e^{-1/s_-}))/s_+) & u_2 > \frac{s_-(1 - e^{-1/s_-})}{s_+ + s_-(1 - e^{-1/s_-})} \end{cases} \quad (21)$$

635  
 636 When epistasis is considered,  $s_+(f_P) = s_{+init}/(1 + g \times (f_P/f_{P,init} - 1))$  and  $s_-(f_P) = s_{-init} \times (1 +$   
 637  $g \times (f_P/f_{P,init} - 1))$  are used in Eq. 21 to calculate  $\Delta f_P$  for each cell with different current  $f_P$  (Methods  
 638 Section 6).

639 If for a certain  $f_P$ ,  $f_{P,mut} = f_P(1 + \Delta f_P) > 1$ ,  $f_{P,mut}$  is set to 1 (upper bound). In general, if a mutation  
 640 increases or decreases the phenotypic parameter beyond its bound, the phenotypic parameter is set to the  
 641 bound value.

642 The above growth-death/birth-mutation cycle is repeated from time 0 to  $T$ . Note that since the size of  
 643 each M and H cell can be larger than 1, the integer numbers of M and H cells,  $I_M$  and  $I_H$ , are generally  
 644 smaller than biomass  $M$  and  $H$ , respectively. At the end of  $T$ , the communities are sorted according to  
 645  $P(T)$ .

646 For community reproduction, we save the current random number generator state to generate random  
 647 numbers for partitioning the Adult. When we do not fix total biomass or total cell number, we do the  
 648 following. We select the Adult community with the highest function (or a randomly-chosen Adult community  
 649 in control simulations). The fold by which this Adult will be diluted is  $n_D = \lfloor (M(T) + H(T))/N_0 \rfloor$  where  
 650  $N_0 = 100$  is the pre-set target for total biomass of a Newborn, and  $\lfloor x \rfloor$  is the floor function that generates the  
 651 largest integer that is smaller than  $x$ .  $I_H + I_M$  random integers between 1 and  $n_D$  are uniformly generated  
 652 so that each M and H cell is assigned a random integer between 1 and  $n_D$ . All cells assigned with the  
 653 same random integer belong to the same Newborn. This generates  $n_D$  newborn communities. This partition  
 654 regimen can be experimentally implemented by pipetting  $1/n_D$  volume of an Adult community into a new  
 655 well. If  $n_D$  is less than  $n_{tot}$  (the total number of communities under selection), all  $n_D$  newborn communities  
 656 are kept. Then, we partition the Adult with the second highest function (or a random community in control  
 657 simulations) to obtain an additional batch of  $n_D$  Newborns, and if this is enough, we will randomly pick  
 658 from these a sufficient number of Newborns to obtain  $n_{tot}$  Newborns. The next cycle then begins.

659 To “fix” Newborn total biomass  $N(0)$  to the target total biomass  $N_0$ , total biomass  $N(0)$  is counted so  
 660 that  $N(0)$  comes closest to the target  $N_0$  without exceeding it (otherwise,  $P(T)$  may exceed the theoretical  
 661 maximum). For example, suppose that a certain number of M and H cells have been sorted into a Newborn  
 662 so that the total biomass is 98.6. If the next cell, either M or H, has a mass of 1.3, this cell goes into  
 663 the community so that the total biomass is  $98.6 + 1.3 = 99.9$ . However, if a cell of mass 1.6 happens to  
 664 be picked, this cell doesn’t go into this community so that this Newborn has a total biomass of 98.6 and  
 665 the cell of mass 1.6 goes to the next Newborn. Thus, each Newborn may not have exactly the biomass of  
 666  $N_0$ , but rather between  $N_0 - 2$  and  $N_0$ . Experimentally, total biomass can be determined from the optical  
 667 density (OD), or from the total fluorescence if cells are fluorescently labeled (bioRxiv). In most simulations  
 668 we fix the total biomass of each Newborn because biomass  $M(t)$  and  $H(t)$  are the quantities used in Eqs.  
 669 6-10 and Eqs. 16-19. If a cell sorter can only track the number of cells (instead of also tracking cell size),  
 670 we perform simulations where we sort a total of  $\lfloor N_0/1.5 \rfloor$  cells into each Newborn, assuming that the  
 671 average biomass of an M or H cell is 1.5. We obtain the same conclusion, as shown in Figure 22 left panels.

672 To fix  $\phi_M(0)$  (while allowing total biomass  $N(0)$  to fluctuate), we generate Newborn communities so that  
 673  $\phi_M(0) = \phi_M(T)$  of the selected Adult community from the previous cycle. Again, because each M and H has  
 674 a biomass (or length) between 1 and 2,  $\phi_M(0)$  of each Newborn community may not be exactly  $\phi_M(T)$  of  
 675 the selected Adult community. In the code, dilution fold  $n_D$  is calculated in the same fashion as mentioned  
 676 above.  $I_M(T)$  random integers between  $[1, n_D]$  are then generated for each M cell. All M cells assigned the  
 677 same random integer belong to the same Newborn community. A total biomass of  $M(0)(1 - \phi_M(T))/\phi_M(T)$   
 678 of H cells should be sorted into this Newborn community. In the code, H cells are randomly dispensed into  
 679 each Newborn community until the total biomass of H comes closest to  $M(0)(1 - \phi_M(T))/\phi_M(T)$  without  
 680 exceeding it. Again, because each H cell has a biomass between 1 and 2, the total biomass of H might not be  
 681 exactly  $M(0)(1 - \phi_M(T))/\phi_M(T)$  but between  $M(0)(1 - \phi_M(T))/\phi_M(T) - 2$  and  $M(0)(1 - \phi_M(T))/\phi_M(T)$ .  
 682 We have also performed simulations where the ratio of M and H cell numbers in the Newborn community,

683  $I_M(0)/I_H(0)$ , is set to  $I_M(T)/I_H(T)$  of the Adult community, and obtain the same conclusion (Figure 22  
684 center panels).

685 To fix both  $N(0)$  and  $\phi_M(0)$ , we sort a total biomass of  $N_0\phi_M(T)$  of M cells and a total biomass of  
686  $N_0(1 - \phi_M(T))$  of H cells into each Newborn community. Here,  $N_0 = 100$  is preset and  $\phi_M(T)$  is measured  
687 from the selected Adult community of the previous cycle. In the code, to form a Newborn community, M cells  
688 are randomly picked from the Adult community until the total biomass of M comes closest to  $N(0)\phi_M(T)$   
689 without exceeding it. H cells are sorted similarly. Because each M and H cells has a length between 1 and  
690 2, the biomass of M can vary between  $N(0)\phi_M(T) - 2$  and  $N(0)\phi_M(T)$  and the biomass of H can vary  
691 between  $N(0)(1 - \phi_M(T)) - 2$  and  $N(0)(1 - \phi_M(T))$ . Although such a partition scheme does not completely  
692 eliminate variations in species composition among Newborn communities, such variations are sufficiently  
693 small so that community selection can improve  $\bar{f}_P(T)$ . We have also performed simulations where the total  
694 number of cells is set to  $\lfloor N_0/1.5 \rfloor$  with  $\lfloor N_0\phi_M(T)/1.5 \rfloor$  M cells and  $\lfloor N_0(1 - \phi_M(T))/1.5 \rfloor$  H cells where  
695  $\phi_M(T) = I_M(T)/(I_M(T) + I_H(T))$  is calculated from the numbers instead of biomass of M and H cells. We  
696 obtain the same conclusion (Figure 22, right panels).

## 697 6 Modeling epistasis on $f_P$

698 Epistasis, where the effect of a new mutation depends on prior mutations (“genetic background”), is known  
699 to affect evolutionary dynamics. Epistatic effects have been quantified in various ways. Experiments on  
700 virus, bacterium, yeast, and proteins have demonstrated that for two mutations that are both deleterious or  
701 random, viable double mutants experience epistatic effects that are nearly symmetrically distributed around  
702 a value near zero [87, 88, 89, 90, 91]. In other words, a significant fraction of mutation pairs show no epistasis,  
703 and a small fraction show positive or negative epistasis (i.e. a double mutant displays a stronger or weaker  
704 phenotype than expected from additive effects of the two single mutants). Epistasis between two beneficial  
705 mutations can vary from being predominantly negative [88] to being symmetrically distributed around zero  
706 [89]. Furthermore, a beneficial mutation tends to confer a lower beneficial effect if the background already  
707 has high fitness (“diminishing returns”) [92, 89, 93].

708 A mathematical model by Wisner et al. incorporates diminishing returns epistasis [86]. In this model,  
709 beneficial mutations of advantage  $s$  in the ancestral background are exponentially distributed with probability  
710 density  $\alpha \exp(-\alpha s)$ , where  $1/\alpha > 0$  is the mean advantage. After a mutation with advantage  $s$  has occurred,  
711 the mean advantage of the next mutation would be reduced to  $1/[\alpha(1 + gs)]$ , where  $g > 0$  is the “diminishing  
712 returns parameter”. Wisner et al. estimates  $g \approx 6$ . This model quantitatively explains the fitness dynamics  
713 of evolving *E. coli* populations.

714 Based on experimental and theoretical literature, we model epistasis on  $f_P$  in the following manner. Let  
715 the relative mutation effect on  $f_P$  be  $\Delta f_P = (f_{P,mut} - f_P)/f_P \geq -1$ . Then,  $\mu(\Delta f_P, f_P)$ , the probability  
716 density function of  $\Delta f_P$  at the current  $f_P$  value, is described by a form similar to Eq. 15:

$$717 \mu(\Delta f_P, f_P) = \begin{cases} \frac{1}{s_+(f_P) + s_-(f_P)(1 - \exp(-1/s_-(f_P)))} \exp(-\Delta f_P/s_+(f_P)) & \text{if } \Delta f_P \geq 0 \\ \frac{1}{s_+(f_P) + s_-(f_P)(1 - \exp(-1/s_-(f_P)))} \exp(\Delta f_P/s_-(f_P)) & \text{if } -1 < \Delta f_P < 0 \end{cases} \quad (22)$$

718 Here,  $s_+(f_P)$  and  $s_-(f_P)$  are respectively the mean  $\Delta f_P$  for enhancing and diminishing mutations at  
719 current  $f_P$ .  $s_+(f_P) = s_{+init}/(1 + g \times (f_P/f_{P,init} - 1))$ , where  $f_{P,init}$  is the  $f_P$  of the initial background (e.g.  
720 0.13 for mono-adapted Manufacturer),  $s_{+init}$  is the mean enhancing  $\Delta f_P$  occurring in the initial background,  
721 and  $0 < g < 1$  is the epistatic factor. Similarly,  $s_-(f_P) = s_{-init} \times (1 + g \times (f_P/f_{P,init} - 1))$  is the mean  
722  $|\Delta f_P|$  for diminishing mutations at current  $f_P$ . In the initial background since  $f_P = f_{P,init}$ , we have  
723  $s_+(f_P) = s_{+init}$  and  $s_-(f_P) = s_{-init}$  where  $s_{+init} = 0.050$  and  $s_{-init} = 0.067$  (Figure 13). For subsequent  
724 mutations, mean  $\Delta f_P$  is modified by epistatic factor  $g$ . Consistent with diminishing returns principle, if  
725 current  $f_P > f_{P,init}$ , then a new enhancing mutation becomes less likely and a new diminishing mutation  
726 becomes more likely (ensured by  $g > 0$ ). Similarly, if current  $f_P < f_{P,init}$ , then a new enhancing mutation  
727 becomes more likely and a diminishing mutation becomes less likely (ensured by  $0 < g < 1$ ). Thus, as  $f_P$   
728 approaches 1,  $s_+(f_P)$  decreases and  $s_-(f_P)$  increases (Figure 14). That is, enhancing mutations become less  
729 likely, and diminishing mutations become more likely. Conversely as  $f_P$  approaches 0, the opposite is true  
730 ( $s_+(f_P)$  increases and  $s_-(f_P)$  decreases, Figure 14). In summary, our model captures not only diminishing  
731 returns of enhancing mutations, but also our understanding of mutational effects on protein stability [72].



## 731 7 Pathology of two alternative definitions of community function

732 For a given Newborn community, we define community function as  $P(T)$ , the total amount of Product at  
733 maturation time  $T$ . Below, we describe the pathology of alternative definitions of community function.

734 Let's consider a simpler case where groups of Manufacturers are selected for high  $P$ , and cell death is  
735 negligible. We have

$$\frac{dM}{dt} = (1 - f_P)g_M M \quad (23)$$

$$\frac{dP}{dt} = f_P g_M M \quad (24)$$

736 where biomass growth rate  $g_M$  is a function of  $B$  and  $R$ . When M and H compete for Resource,  $g_M$  also  
737 depends implicitly on  $f_P$  because  $f_P$  affects M:H and therefore  $B$  and  $R$ .

738 Since from Eq. 23 and 24

$$\frac{dM}{(1 - f_P)dt} = \frac{dP}{f_P dt}$$

739 we have

$$P(T) = \frac{f_P}{1 - f_P} (M(T) - M(0)) \approx \frac{f_P}{1 - f_P} M(T)$$

740 if  $M(T) \gg M(0)$ . This is true if  $T$  is long enough for cells to double at least three or four times.

741 If we define community function as  $P(T)/M(T)$  (total Product normalized against  $M$  biomass in Adult  
742 community),  $P(T)/M(T) \approx \frac{f_P}{1 - f_P}$ . Under this definition, higher  $\frac{f_P}{1 - f_P}$  or higher  $f_P$  always leads to higher  
743 community function, and higher  $f_P$  in turn leads to  $M$  extinction (Figure 3).

744 If the community function is instead defined as  $P(T)/M(0)$ , then

$$\frac{P(T)}{M(0)} \approx \frac{f_P}{1 - f_P} \frac{M(T)}{M(0)} = \frac{f_P}{1 - f_P} \exp\left((1 - f_P) \int_T g_M dt\right) \quad (25)$$

745 From Eq. 25, at a fixed  $f_P$ ,  $\frac{P(T)}{M(0)}$  increases as  $\int_T g_M dt$  increases.  $\int_T g_M dt$  increases as  $\phi_M(0)$  decreases,  
746 since the larger fraction of Helper, the faster the accumulation of Byproduct and the larger  $\int_T g_M dt$  (Figure  
747 27B). Thus, we end up selecting communities with small  $\phi_M(0)$  (Figure 12). This means that Manufactures  
748 could get lost during community reproduction, and community selection then fails.

749 For groups or communities with a certain  $\int_T g_M dt$ , we can calculate  $f_P$  optimal for community function  
750 from Eq. 25 by setting

$$\frac{dP(T)}{df_P} = M(0) \frac{d}{df_P} \left[ \frac{f_P}{1 - f_P} \exp\left((1 - f_P) \int_T g_M dt\right) \right] = 0$$

751 We have  $\frac{1}{(1 - f_P)^2} \exp\left((1 - f_P) \int_T g_M dt\right) - \frac{f_P}{1 - f_P} \int_T g_M dt \exp\left((1 - f_P) \int_T g_M dt\right) = 0$ , or  $1/\int_T g_M dt =$   
752  $f_P(1 - f_P)$ .

753 If  $\int_T g_M dt \gg 1$ ,  $f_P$  is very small, and the optimal  $f_P$  for  $P(T)$  is

$$f_P^* \approx \left(\int_T g_M dt\right)^{-1} \quad (26)$$

## 754 8 Identify optimal $P(T)$

755 For a Newborn community with total biomass  $N(0) = 100$ , we fix growth parameters of M and H to upper  
756 bounds, and calculate  $P(T)$  under various  $f_P$  and  $\phi_M(0)$ . Since both numbers range between 0 and 1, we  
757 calculate  $P(T, f_P = 0.01 \times i, \phi_M(0) = 0.01 \times j)$  for integers  $i$  and  $j$  between 1 and 99. There is a global  
758 maximum for  $P(T)$  when  $i = 41$  and  $j = 54$  (see the accompanying article). Therefore the optimal  $f_P$  and  
759  $\phi_M(0)$  combination for a Newborn community with  $N(0) = 100$  are 0.41 and 0.54, respectively.

## 760 9 Pathology associated with community reproduction via fixed-fold 761 dilution

762 If Resource is unlimited, then there is no competition between H and M. According to Eq. 25,  $P(T)$   
763 increases linearly with  $M(0)$ .  $P(T)$  also increases with  $H(0)$ , since higher  $H(0)$  leads to higher Byproduct  
764 and consequently higher  $\int_T g_M dt$  in the exponent. Newborn communities can vary significantly in their  $N(0)$   
765 due to stochastic fluctuations (with a standard deviation of  $\sqrt{N_0}$ ). Thus each cycle, communities with larger  
766  $N(0)$  (instead of higher  $f_p$ ) will get selected. With unlimited Resource, the size of an Adult community has  
767 no upper bound. After a fixed-fold dilution,  $N(0)$  also has no upper bound. In comparison, the average  $f_p$   
768 of different Newborns do not vary nearly as much (Figure 8).

## 769 Acknowledgment

770 We thank the following for discussions: members of the Shou group, Lin Chao (UCSD), Maitreya Dunham  
771 (UW Seattle), Corina Tarnita (Princeton), and Harmit Malik (Fred Hutch). We thank Alex Yuan (UW  
772 Seattle), Chichun Chen (Indiana University Bloomington), Bill Hazelton, Samuel Hart, David Skelding,  
773 and Doug Jackson for feedback on the manuscript. This research was supported by the High Performance  
774 Computing Shared Resource of the Fred Hutch (P30 CA015704).

## 775 Supplementary Figures

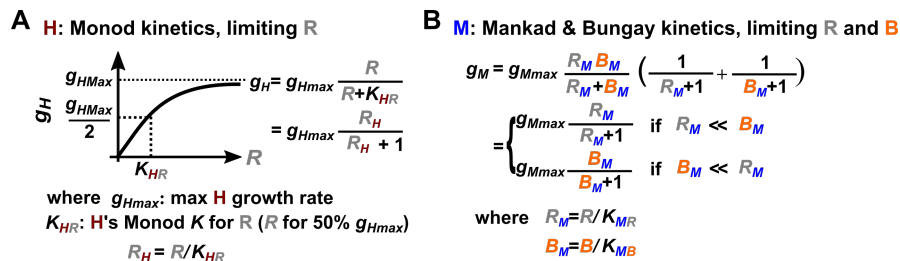

Figure 9: **Figure 2-figure supplement 1.** (A) H growth follows Monod kinetics, reaching half maximal growth rate when  $R = K_{HR}$ . (B) M growth follows dual-substrate Mankad and Bungay kinetics. When Resource  $R$  is in great excess ( $R_M \gg B_M$ ) or Byproduct  $B$  is in great excess ( $B_M \gg R_M$ ), we recover mono-substrate Monod kinetics (A).

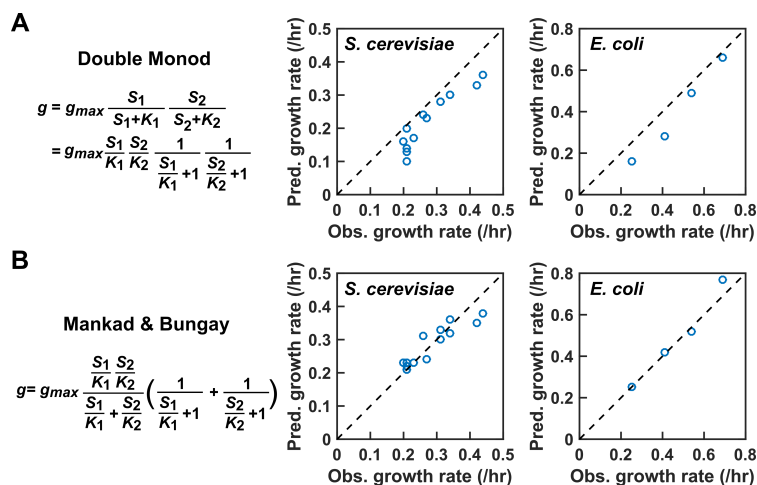

Figure 10: **Figure 2-figure supplement 2. A comparison of dual-substrate models.** Suppose that cell growth rate depends on each of the two substrates  $S_1$  and  $S_2$  in a Monod-like, saturable fashion. When  $S_2$  is in excess, the  $S_1$  at which half maximal growth rate is achieved is  $K_1$ . When  $S_1$  is in excess, the  $S_2$  at which half maximal growth rate is achieved is  $K_2$ . (A) In the “Double Monod” model, growth rate depends on the two limiting substrates in a multiplicative fashion. In the model proposed by Mankad and Bungay (B), growth rate takes a different form. In both models, when one substrate is in excess, growth rate depends on the other substrate in a Monod-fashion. However, differences exist. For example, when  $\frac{S_1}{K_1} = \frac{S_2}{K_2} = 1$ , the growth rate is predicted to be  $g_{max}/2$  by Mankad & Bungay model, and  $g_{max}/4$  by the Double Monod model. Mankad and Bungay model outperforms the Double Monod model in describing experimental data of *S. cerevisiae* and *E. coli* growing on low glucose and low nitrogen. The figures are plotted using data from Ref. [43].

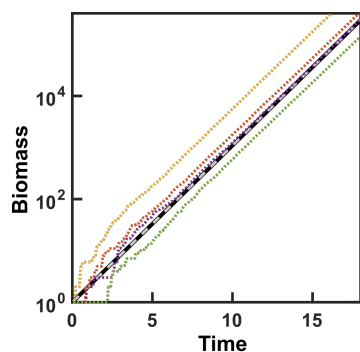

Figure 11: **Figure 2-figure supplement 3. A comparison of birth models.** We modeled exponential biomass growth in excess metabolites. Thick black line: analytical solution with biomass growth rate (0.7/time unit). Grey dashed line: simulation assuming that biomass increases exponentially at 0.7/time unit and that cell division occurs upon reaching a biomass threshold, an assumption used in our model. Color dotted lines: simulations assuming that cell birth occurs at a probability equal to the birth rate multiplied with the length of simulation time step ( $\Delta\tau = 0.05$ ). When a cell birth occurs, biomass increases discretely by 1, resulting in step-wise increase in color dotted lines at early time.

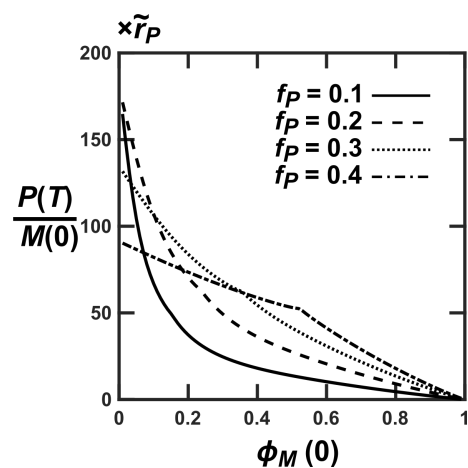

Figure 12: **Figure 2-figure supplement 4.** The pathology of artificial community selection if community function is defined as  $P(T)/M(0)$ . Over the range of  $f_P$  where M and H can coexist,  $P(T)/M(0)$  increases as  $\phi_M(0)$  decreases.

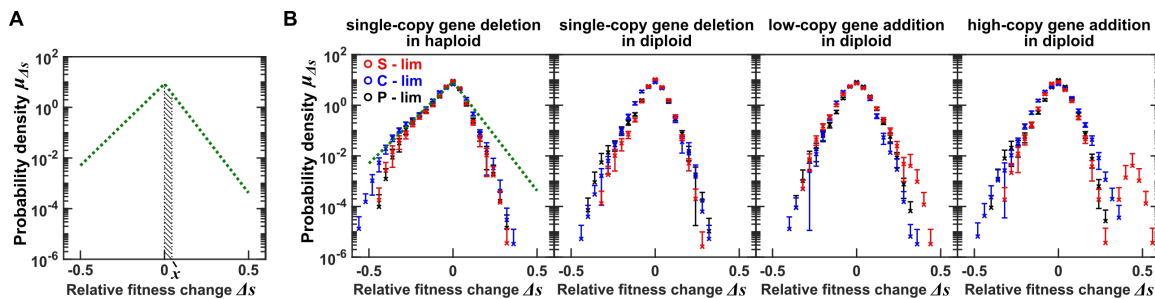

Figure 13: **Figure 4 - Figure Supplement 1. Probability density functions of changes in relative fitness due to mutations (  $\mu_{\Delta s}(\Delta s)$  ).** (A) Suppose that green line represents the probability density function of  $\Delta s$ , the relative fitness change in mutants. Then the probability  $P(0 \leq \Delta s \leq x)$  is the area of the shaded region. (B) We derived  $\mu_{\Delta s}(\Delta s)$  from the Dunham lab data [52] where bar-coded mutant strains were competed under sulfate-limitation (red), carbon-limitation (blue), or phosphate-limitation (black). Error bars represent uncertainty  $\delta\mu_{\Delta s}$  (the lower error bar is omitted if the lower estimate is negative). In the leftmost panel, green lines show non-linear least squared fitting of data to Eq. 15 using all three sets of data. Note that data with larger uncertainty are given less weight, and thus deviate more from the fitting lines. For an exponentially-distributed probability density function, the average fitness effect is  $1/\text{slope}$ . From the green line on the right side, we obtain the average effect of enhancing mutations  $s_+ = 0.050 \pm 0.002$ , and from the green line on the left side, we obtain the average effect of diminishing mutations  $s_- = 0.067 \pm 0.003$ .

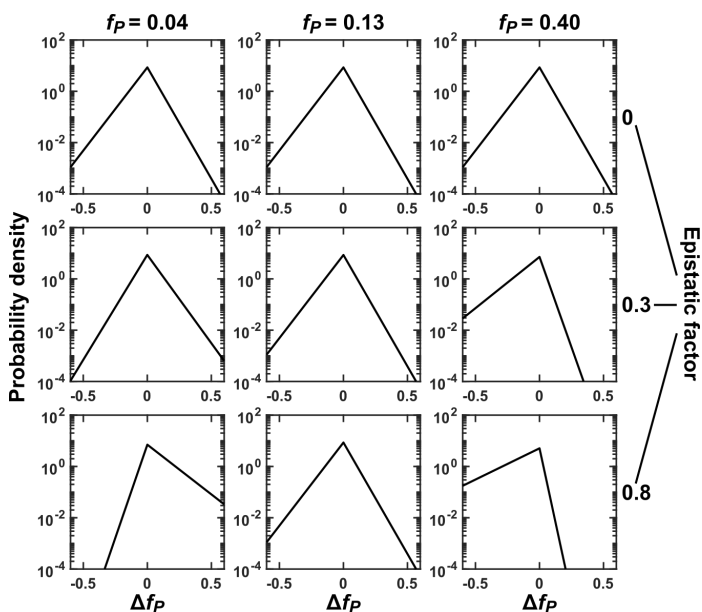

Figure 14: **Figure 4-Figure Supplement 2. Mutation effects under epistasis.** Distribution of mutation effects at different current  $f_P$  values are plotted. (Top) When there is no epistasis, distribution of mutational effects on  $f_P$  ( $\Delta f_P$ ) are identical regardless of current  $f_P$ . (Middle and Bottom) With epistasis (see Methods Section 6 for definition of epistasis factor), mutational effects on  $f_P$  depend on the current value of  $f_P$ . If current  $f_P$  is low (left), enhancing mutations are more likely to occur while diminishing mutations are less likely to occur; if current  $f_P$  is high (right), the opposite is true.

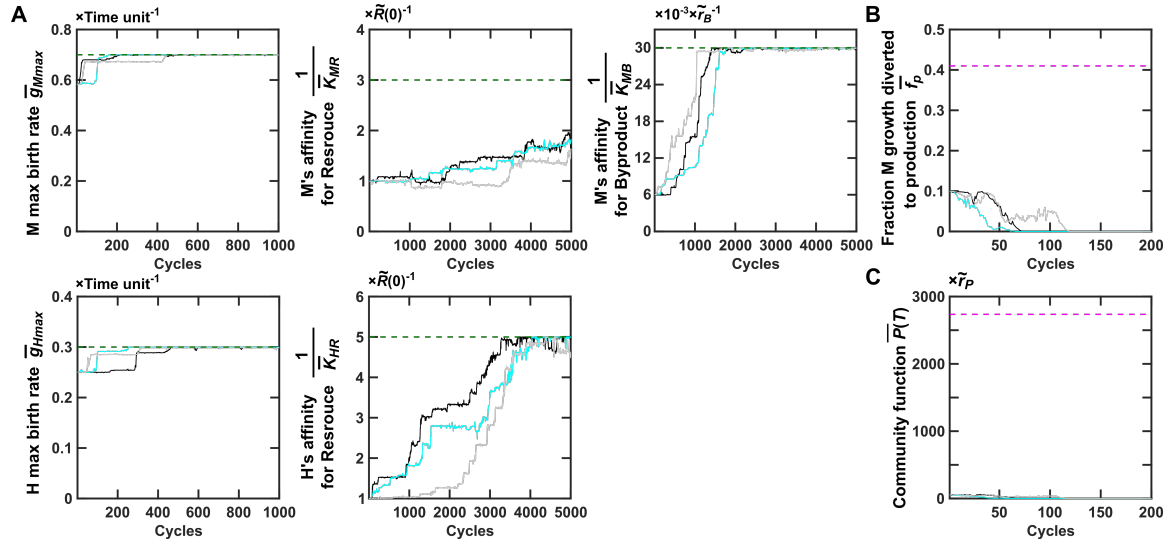

Figure 15: **Figure 5-Figure Supplement 1. Community function declines to zero in the absence of community selection.** Without community selection, natural selection favors fast growers with improved maximal growth rates and improved affinities for nutrients (A). Consequently,  $f_P$  (B) and thus  $P(T)$  (C) decrease to zero. Maximal growth rates of H and M ( $g_{Hmax}$  and  $g_{Mmax}$ ), H's affinity for Resource  $1/K_{HR}$ , and M's affinity for Byproduct  $1/K_{MB}$  rapidly improve to their respective upper bounds, while M's affinity for Resource  $1/K_{MR}$  improves more slowly. This is consistent with M's growth being more limited by Byproduct.  $\bar{P}(T)$  is averaged across the two randomly selected Adult communities.  $\bar{g}_{Mmax}$ ,  $\bar{g}_{Hmax}$ , and  $\bar{f}_P$  are obtained by averaging within each randomly-selected Adult community and then averaging across the two randomly-selected Adult communities.  $K_{SpeciesMetabolite}$  are averaged within each randomly-selected Adult community, then across the two randomly-selected Adults, and finally inverted to represent average affinity. Green dashed lines: upper bounds of phenotypes; Magenta dashed lines:  $f_P$  optimal for community function and maximal  $P(T)$  when all five growth parameters are fixed at their upper bounds and  $\phi_M(0)$  is also optimal for  $P(T)$ . Note different x axis scales. Black, cyan, and gray curves show three independent simulations.

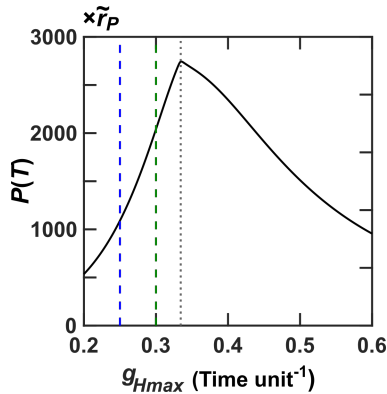

Figure 16: **Figure 5-Figure Supplement 2. Improving maximal growth rate of Helper  $g_{Hmax}$  does not necessarily improve community function.** We have chosen the ancestral (blue dashed line) and the evolutionary upper bound (green dashed line) of  $g_{Hmax}$  such that improving  $g_{Hmax}$  improves community function. Suppose we have chosen ancestral  $g_{Hmax}$  at the grey dotted line, then higher  $g_{Hmax}$  would lower community function. The black curve is obtained by numerically integrating Eqs. 6-10 at different  $g_{Hmax}$  values where  $f_P$  is set to 0.4 and all growth parameters except for  $g_{Hmax}$  are set to their respective upper bounds.  $N(0)$  is 100, and  $\phi_M(0)$  is 0.7 (close to steady-state value).

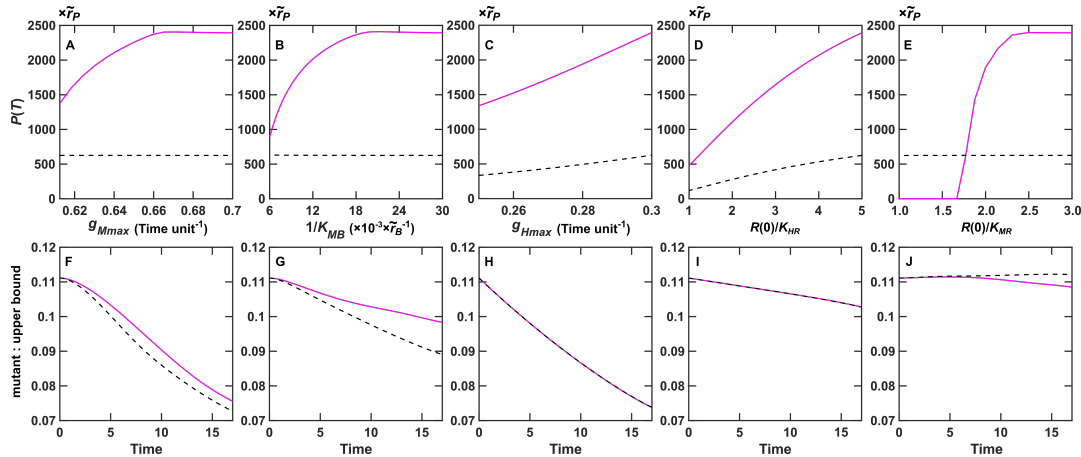

Figure 17: **Figure 5-Figure Supplement 3. Improving maximal growth rates and nutrient affinities generally, but do not always, improve individual fitness and community function.** In all figures, solid and dashed lines respectively represent dynamics when  $f_P = 0.41$  (optimal for community function if all growth parameters are fixed at their upper bounds; Figure 6A) and  $f_P = 0.13$  (optimal for M monoculture production when Byproduct is in excess; Figure 6B). (A-D) Community function increases as  $g_{Mmax}$ ,  $1/K_{MB}$ ,  $g_{Hmax}$  or  $1/K_{HR}$  increases when other growth parameters are fixed at their upper bounds. For example, In (A), all growth parameters except for  $g_{Mmax}$  are at their upper bounds, and for each combination of  $g_{Mmax}$  and  $f_P$ , the steady-state  $\phi_{M,SS}$  is calculated using equations in Methods Section 1. This steady-state  $\phi_{M,SS}$  is then used to calculate  $P(T)$ . (F-I) respectively show that mutant individuals with  $g_{Mmax}$ ,  $1/K_{MB}$ ,  $g_{Hmax}$  or  $1/K_{HR}$  10% lower than the upper bound have lower fitness. For example in (F), a Newborn community has 70 M and 30 H. 90% of M have upper bound  $g_{Mmax} = 0.7$  (“upper bound”). 10% of M have  $g_{Mmax} = 0.63$ , 10% less than the upper bound (“mutant”). Other growth parameters are all at upper bounds. The ratio between mutant and upper bound drops over maturation time, indicating that M cells with mutant (lower) maximal growth rate have lower fitness. (E, J) When  $f_P = 0.13$  (black dashed line) but not when  $f_P = 0.41$  (magenta line), increasing M’s affinity for Resource ( $1/K_{MR}$ ) slightly decreases both  $P(T)$  and individual fitness.

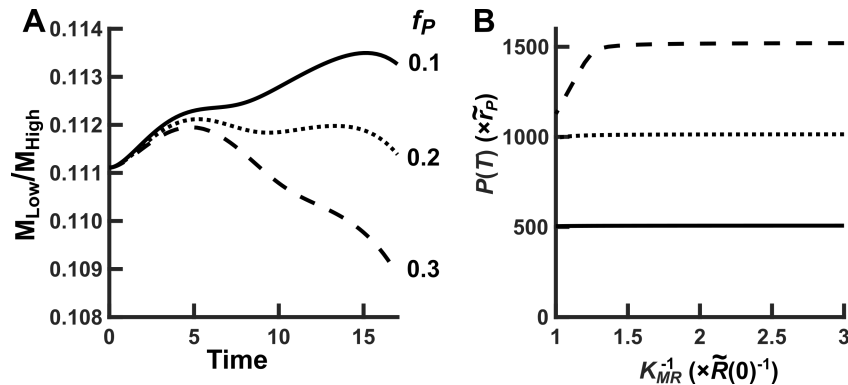

Figure 18: **Figure 5-Figure Supplement 4. At low  $f_P$ , higher  $1/K_{MR}$  can lead to reduced M growth rate.** (A) The ratio between  $M_{Low}$  with low affinity for R ( $K_{MR}^{-1} = 2.5\tilde{R}(0)^{-1}$ ) and  $M_{High}$  with high affinity for R ( $K_{MR}^{-1} = 3\tilde{R}(0)^{-1}$ ) when their  $f_P$  is equal to 0.1 (solid line), 0.2 (dotted line) and 0.3 (dashed line) are plotted over one maturation cycle. (B)  $P(T)$  improves over increasing affinity  $K_{MR}^{-1}$  when  $f_P$  is 0.1 (solid line), 0.2 (dotted line) and 0.3 (dashed line). The dependence of  $P(T)$  on  $K_{MR}^{-1}$  is rather weak for low  $f_P$ . For example, when  $K_{MR}^{-1}$  increases from  $\tilde{R}(0)^{-1}$  to  $3\tilde{R}(0)^{-1}$ ,  $P(T)$  increases only by 2% and 0.6% for  $f_P = 0.2$  and  $f_P = 0.1$ , respectively.

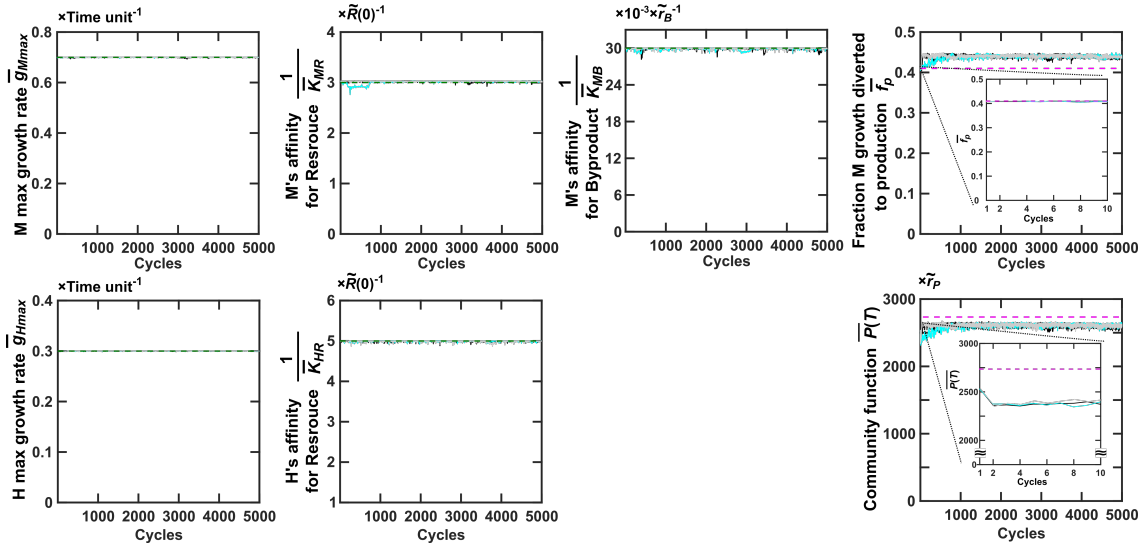

Figure 19: **Figure 6-Figure Supplement 1. Local optimality of community function  $P^*(T)$ .** We start each Newborn community with total biomass  $N(0)=100$ , all five growth parameters at their upper bounds, and  $f_P^* = 0.41$  and  $\phi_M^*(0) = 0.54$  to achieve  $P^*(T)$ . We then allow all five growth parameters and  $f_P$  to mutate while applying community selection. To ensure effective community selection (see the last section of Results), during community reproduction, we fix  $N(0)$  to 100, and assign  $\phi_M(0)$  to  $\phi_M(T)$  of the previous cycle. We find that all five growth parameters remain at their respective evolutionary upper bounds. At the end of the first cycle (Cycle=1 in insets), even though  $\bar{f}_P$  has not changed,  $\bar{P}(T)$  has already declined from the magenta dashed line. This is because  $\phi_M(0)$  has changed via ecological interactions to 0.73, close to the steady state  $\phi_{M,SS}$  instead of the optimal  $\phi_M^*(0)$  of 0.54. Later, over hundreds of cycles,  $\bar{f}_P$  gradually increases, which increases  $\bar{P}(T)$ . However,  $\bar{P}(T)$  is still below maximal. This is because species composition gravitates toward steady state  $\phi_{M,SS}$  which deviates from what is required for  $P^*(T)$ . See the accompanying article for further discussions.  $\bar{g}_{Mmax}$ ,  $\bar{g}_{Hmax}$ , and  $\bar{f}_P$  are obtained by averaging within each selected Adult community and then averaging across the two selected Adults.  $K_{SpeciesMetabolite}$  are similarly averaged, and then inverted to represent average affinity. Green dashed lines: upper bounds of phenotypes; Magenta dashed lines:  $f_P^*$  and  $P^*(T)$  when all five growth parameters are fixed at their upper bounds and  $\phi_M(0) = \phi_M^*(0)$ .

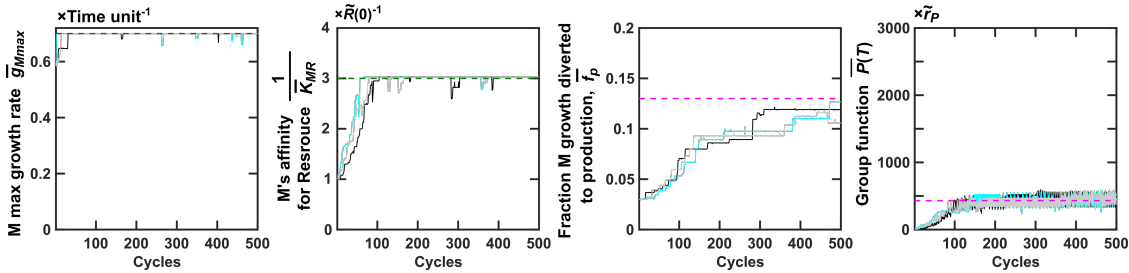

Figure 20: **Figure 6-Figure Supplement 2. Selection dynamics of M mono-species groups.** Phenotypes averaged over selected groups are plotted. Because Byproduct is in excess,  $K_{MB}$  terms are no longer relevant in equations (Figure 10,  $R_M \ll B_M$ ). upper bounds of  $g_{Mmax}$  and  $1/K_{MR}$  are marked with green dashed lines. Magenta lines mark maximal  $f_P$  and  $P(T)$  when  $g_{Mmax}$  and  $1/K_{MR}$  are fixed at their upper bounds and when Byproduct is in excess.



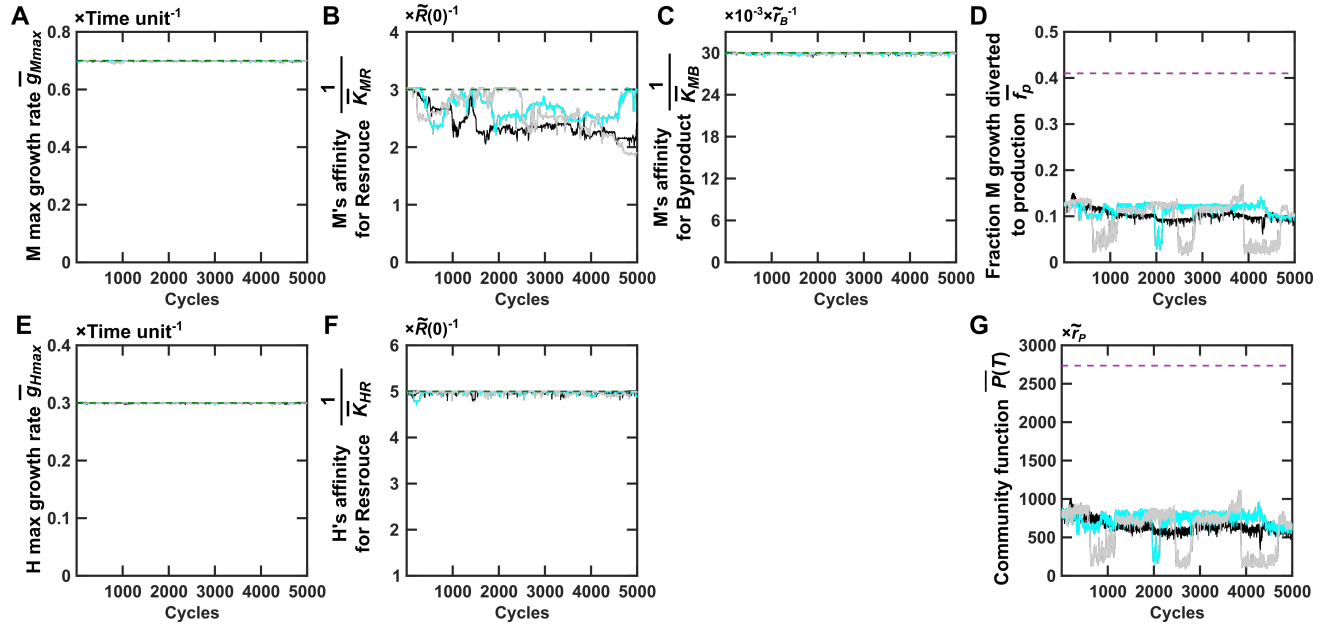

Figure 21: . **Figure 7-Figure supplement 1. Selection dynamics of communities of mono-adapted H and M when allowing all parameters to vary.**  $g_{Mmax}$ ,  $g_{Hmax}$ ,  $1/K_{MB}$  and  $1/K_{HR}$  remain mostly constant during community selection because mutants with lower-than-maximal values are weeded out by natural selection as well as community selection. However,  $1/K_{MR}$  decreases slightly because at low  $f_P$ , M with a lower affinity for R (lower  $1/K_{MR}$ ) slight improves individual fitness while slightly decreasing community function (Figure 18).  $\bar{g}_{Mmax}$ ,  $\bar{g}_{Hmax}$ , and  $\bar{f}_P$  are obtained by averaging within each selected Adult community and then averaging across the two selected Adults.  $K_{SpeciesMetabolite}$  are similarly averaged, and then inverted to represent average affinity.  $\bar{P}(T)$  are averaged across the two selected Adults. Black, cyan and gray curves are three independent simulations. Green dashed lines indicate upper bounds for growth parameters. Magenta dashed lines:  $f_P$  optimal for community function and optimal  $P(T)$  when all five growth parameters are fixed at their upper bounds and  $\phi_M(0)$  is also optimal for  $P(T)$ .

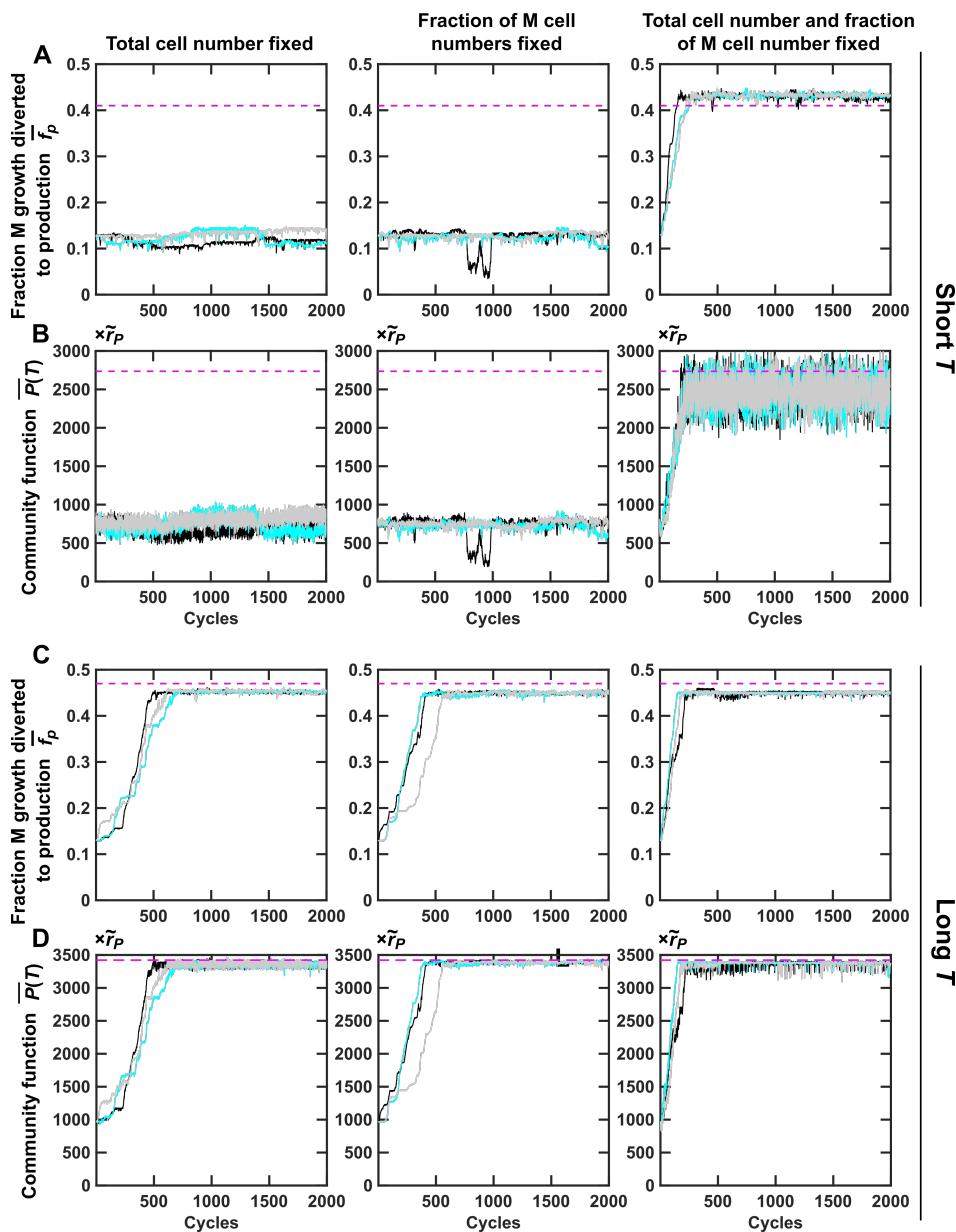

Figure 22: **Figure 7-Figure Supplement 2. Fixing H and M cell numbers (instead of biomass) during community reproduction allows short- $T$  selection regimen to improve community function.** For left panels, the total cell number is fixed to  $\lfloor N_0/1.5 \rfloor$ . For center panels, the ratio between M and H cell numbers are fixed to  $I_M(T)/I_H(T)$ , where  $I_M(T)$  and  $I_H(T)$  are the number of M and H cells in the selected Adult community, respectively. For right panels, the total cell numbers are fixed to  $\lfloor N_0/1.5 \rfloor$  and the ratio between M and H cell numbers are fixed to  $I_M(T)/I_H(T)$ . See Methods Section 5 for details of simulating community reproduction.  $\bar{f}_P$  is averaged across members of each selected community, and subsequently averaged across the two selected communities. Community function  $\bar{P}(T)$  is averaged across the two selected communities. Black, cyan and gray curves are three independent simulations.

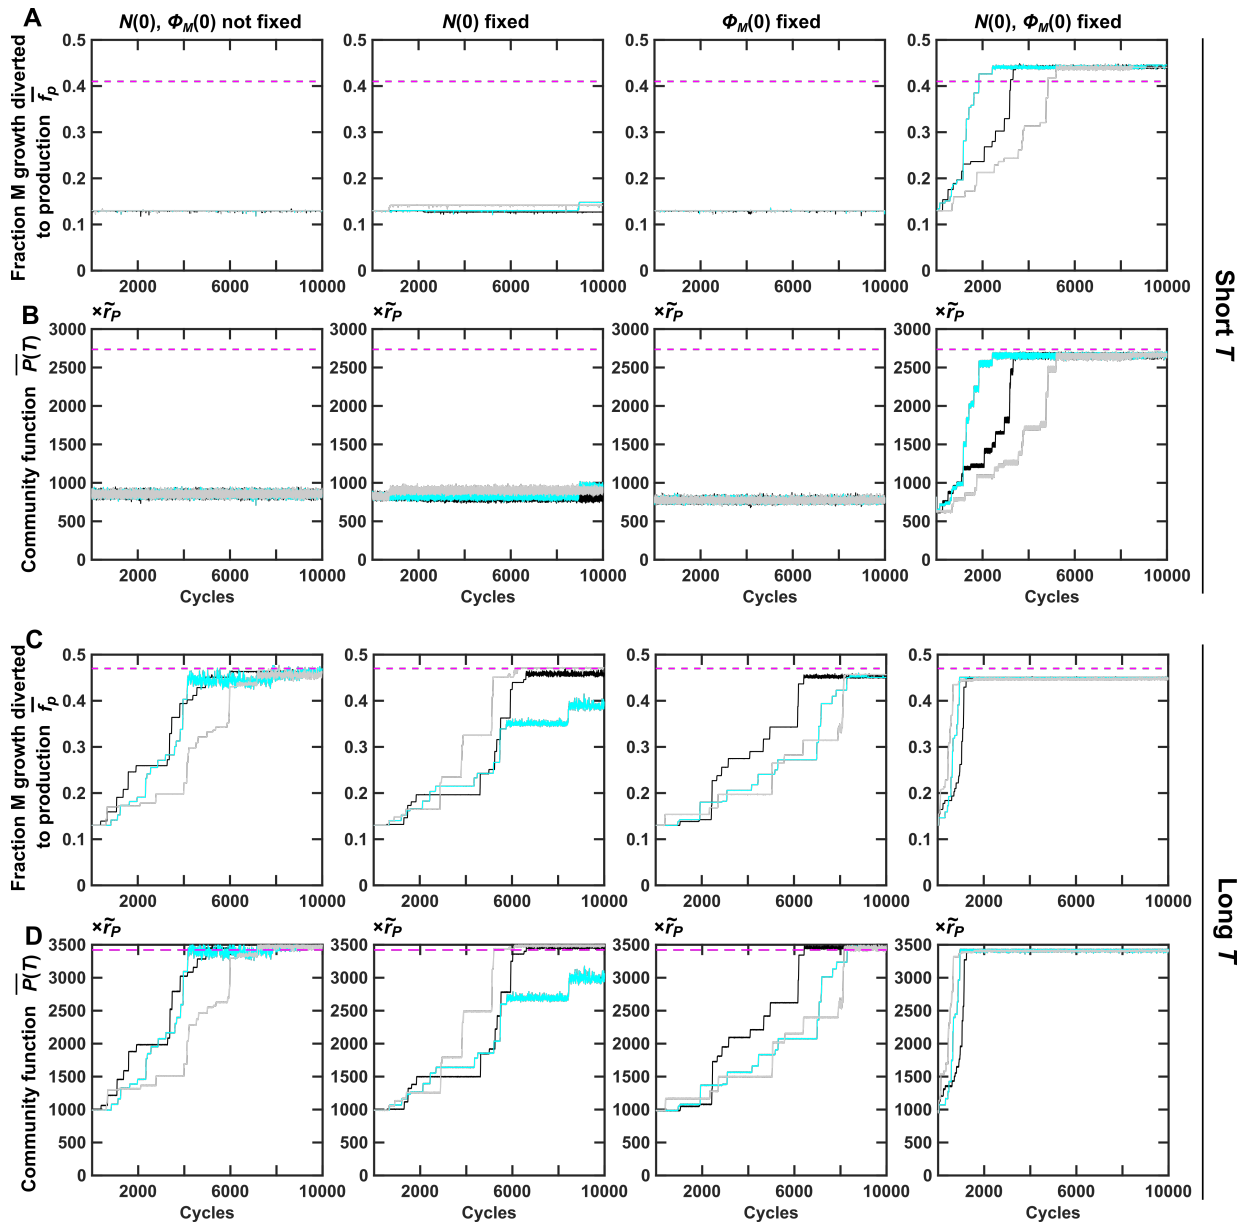

Figure 23: **Figure 7-Figure Supplement 3. Evolution dynamics of selected Adult communities at a low mutation rate of  $2 \times 10^{-5}$  per cell per generation.** (A, B) At short maturation time ( $T = 17$ , Resource is not exhausted in an average community), fixing both  $N(0)$  and  $\phi_M(0)$  is required for community function to improve. (C, D) At long maturation time ( $T = 20$ , Resource is exhausted in an average community), community function improves without needing to fix  $N(0)$  or  $\phi_M(0)$ . When both are fixed, community function improves even faster.  $\bar{f}_P$  is averaged across members of each selected community, and subsequently averaged across the two selected communities. Community function  $\bar{P}(T)$  is averaged across the two selected communities. Black, cyan and gray curves are three independent simulations. At this low mutation rate, because the population size of a community never exceeds  $10^4$ , a mutation occurs on average every 5 cycles, resulting in step-wise improvement in both  $\bar{f}_P(T)$  and  $\bar{P}(T)$ .

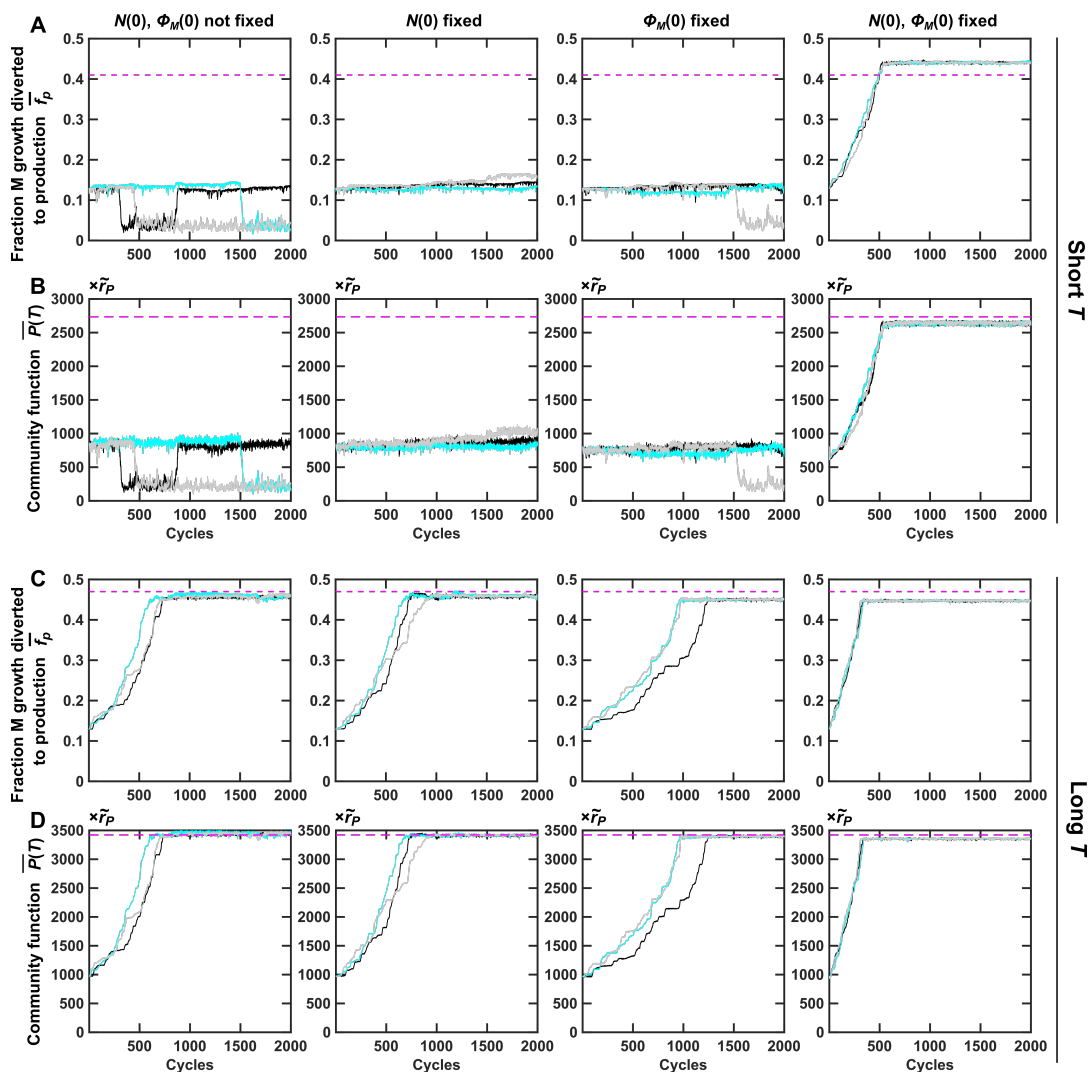

Figure 24: **Figure 7-Figure Supplement 4. Evolution dynamics of selected Adult communities under a different distribution of mutation effect.** Here, the distribution of mutation effects is specified by Eq. 15 where  $s_+ = s_- = 0.02$  are constants.  $\bar{f}_p$  is averaged across members of each selected community, and subsequently averaged across the two selected communities. Community function  $\bar{P}(T)$  is averaged across the two selected communities. Black, cyan and gray curves are three independent simulations.

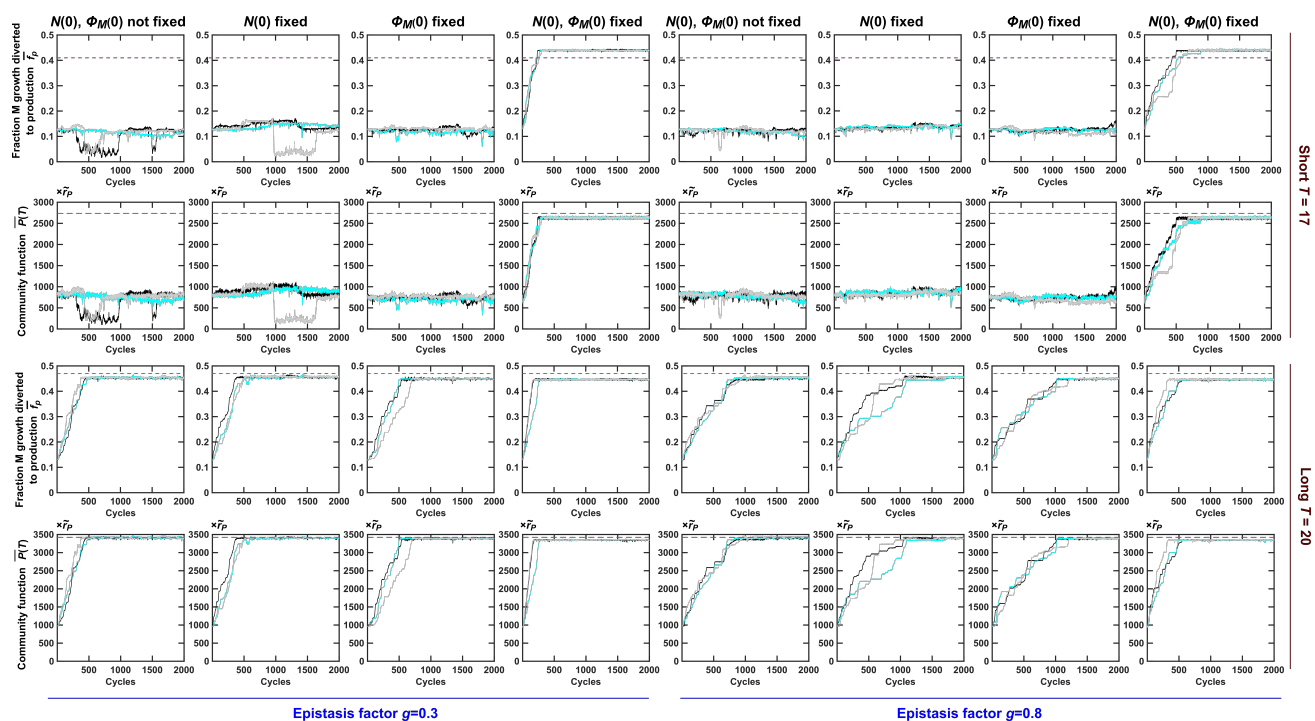

Figure 25: **Figure 7-Figure Supplement 5. Evolution dynamics of selected Adult communities when epistasis is considered.** When we incorporate different epistasis strengths (epistasis factor of 0.3 and 0.8), we obtain essentially the same conclusions as when epistasis is not considered (Figure 7).  $\bar{f}_P$  is averaged across members of each selected community, and subsequently averaged across the two selected communities. Community function  $\bar{P}(T)$  is averaged across the two selected communities. Black, cyan and gray curves are three independent simulations.

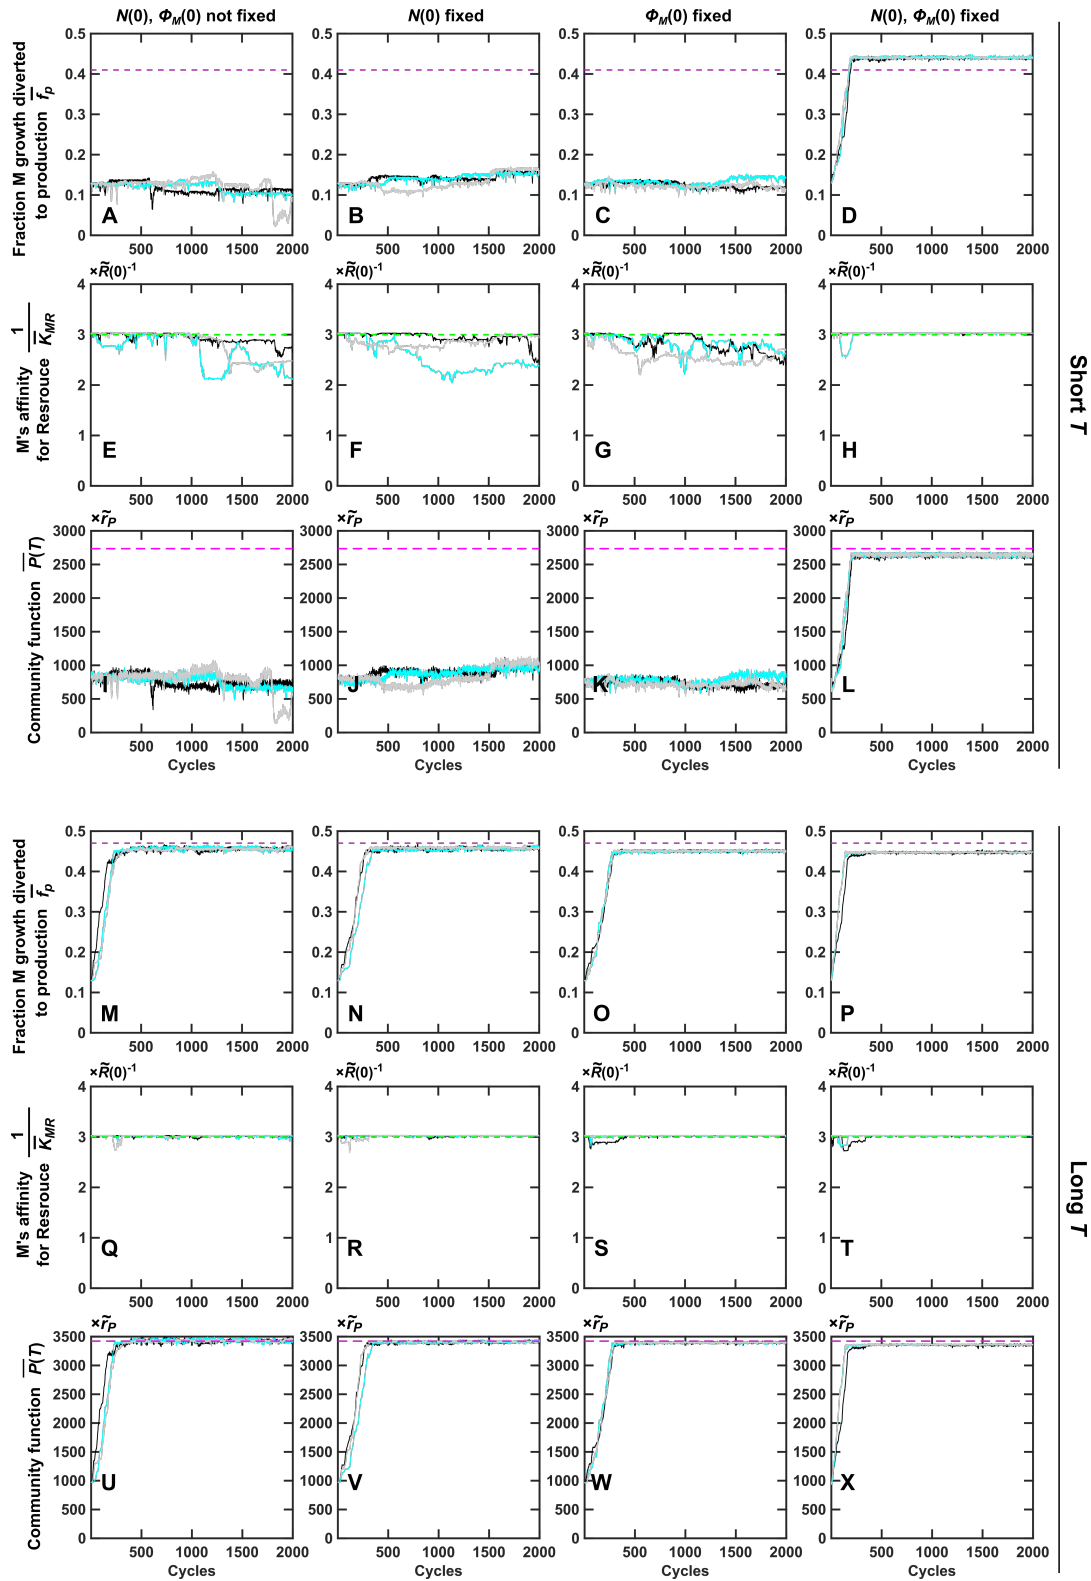

Figure 26: **Figure 7-Figure Supplement 6. Evolution dynamics of selected Adult communities when both  $f_P$  and  $K_{MR}$  are allowed to mutate.** Green dashed lines indicate upper bounds for growth parameters. Magenta dashed lines:  $f_P$  optimal for community function and optimal  $P(T)$  when all five growth parameters are fixed at their upper bounds and  $\phi_M(0)$  is also optimal for  $P(T)$ .  $\bar{f}_P$  is averaged across members of each selected community, and subsequently averaged across the two selected communities.  $\bar{K}_{MR}$  is similarly averaged, and then inverted to represent average affinity. Community function  $\bar{P}(T)$  is averaged across the two selected communities. Black, cyan and gray curves are three independent simulations.

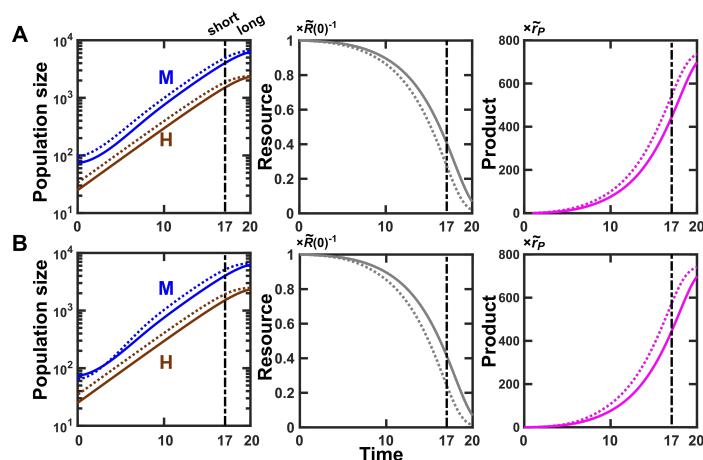

Figure 27: **Figure 8-Figure Supplement 1. Variations in community function can arise from non-heritable variations in Newborn compositions.** An average Newborn community (solid lines) has a total biomass of 100 with 75% M. (A) A “lucky” Newborn community (dotted lines), by stochastic fluctuations, has a total biomass of 130 with 75% M. Even though the two communities share identical  $f_P = 0.1$ , the Newborn with 130 total biomass has its M growing to a larger size (left), depleting more Resource (middle), and making more Product (right) if  $T$  is short. (B) A “lucky” Newborn community (dotted lines), by stochastic fluctuations, has 100 total biomass with 65% M. Even though the two communities share identical  $f_P = 0.1$ , the Newborn with lower  $\phi_M(0)$  (dotted) has its M enjoying a shorter growth lag and growing to a larger size (left), depleting more Resource (middle), and making more Product (right) if  $T$  is short. In both cases, the difference between lucky (dotted) and average (solid) communities is diminished at longer  $T$  ( $T = 20$ ) compared to shorter  $T$  ( $T = 17$ , dash dot line).

## 776 References

- 777 [1] Trevor D. Lawley, Simon Clare, Alan W. Walker, Mark D. Stares, Thomas R. Connor, Claire Raisen,  
778 David Goulding, Roland Rad, Fernanda Schreiber, Cordelia Brandt, Laura J. Deakin, Derek J. Pickard,  
779 Sylvia H. Duncan, Harry J. Flint, Taane G. Clark, Julian Parkhill, and Gordon Dougan. Targeted resto-  
780 ration of the intestinal microbiota with a simple, defined bacteriotherapy resolves relapsing *Clostridium*  
781 *difficile* disease in mice. *PLoS pathogens*, 8(10):e1002995, 2012.
- 782 [2] Souichiro Kato, Shin Haruta, Zong Jun Cui, Masaharu Ishii, and Yasuo Igarashi. Effective cellulose de-  
783 gradation by a mixed-culture system composed of a cellulolytic *Clostridium* and aerobic non-cellulolytic  
784 bacteria. *FEMS Microbiology Ecology*, 51(1):133–142, 2004.
- 785 [3] Stefanie Widder, Rosalind J. Allen, Thomas Pfeiffer, Thomas P. Curtis, Carsten Wiuf, William T.  
786 Sloan, Otto X. Cordero, Sam P. Brown, Babak Momeni, Wenying Shou, Helen Kettle, Harry J. Flint,  
787 Andreas F. Haas, Béatrice Laroche, Jan-Ulrich Kreft, Paul B. Rainey, Shiri Freilich, Stefan Schuster,  
788 Kim Milferstedt, Jan R. van der Meer, Tobias Großkopf, Jef Huisman, Andrew Free, Cristian Picioreanu,  
789 Christopher Quince, Isaac Klapper, Simon Labarthe, Barth F. Smets, Harris Wang, Isaac Newton In-  
790 stitute Fellows, and Orkun S. Soyer. Challenges in microbial ecology: building predictive understanding  
791 of community function and dynamics. *The ISME Journal*, March 2016. 00001.
- 792 [4] Stephen R. Lindemann, Hans C. Bernstein, Hyun-Seob Song, Jim K. Fredrickson, Matthew W. Fields,  
793 Wenying Shou, David R. Johnson, and Alexander S. Beliaev. Engineering microbial consortia for  
794 controllable outputs. *The ISME Journal*, 10(9):2077–2084, September 2016.
- 795 [5] Jian Zhou, Qian Ma, Hong Yi, Lili Wang, Hao Song, and Ying-Jin Yuan. Metabolome profiling reveals  
796 metabolic cooperation between *Bacillus megaterium* and *Ketogulonicigenium vulgare* during induced  
797 swarm motility. *Applied and Environmental Microbiology*, 77(19):7023–7030, October 2011. 00038.
- 798 [6] R. E. Wheatley. The consequences of volatile organic compound mediated bacterial and fungal inte-  
799 ractions. *Antonie van Leeuwenhoek*, 81(1-4):357–364, December 2002. 00123.
- 800 [7] Kwang-sun Kim, Soohyun Lee, and Choong-Min Ryu. Interspecific bacterial sensing through airborne  
801 signals modulates locomotion and drug resistance. *Nature Communications*, 4:1809, 2013.
- 802 [8] Matthew F Traxler, Jeramie D Watrous, Theodore Alexandrov, Pieter C Dorrestein, and Roberto Kolter.  
803 Interspecies interactions stimulate diversification of the *Streptomyces coelicolor* secreted metabolome.  
804 *mBio*, 4(4), 2013.
- 805 [9] A. Cramer, E. A. Whitehorn, E. Tate, and W. P. Stemmer. Improved green fluorescent protein by  
806 molecular evolution using DNA shuffling. *Nature Biotechnology*, 14(3):315–319, March 1996.
- 807 [10] Manfred T. Reetz and José Daniel Carballeira. Iterative saturation mutagenesis (ISM) for rapid directed  
808 evolution of functional enzymes. *Nature Protocols*, 2(4):891–903, April 2007.
- 809 [11] Eric T. Boder, Katarina S. Midelfort, and K. Dane Wittrup. Directed evolution of antibody fragments  
810 with monovalent femtomolar antigen-binding affinity. *Proceedings of the National Academy of Sciences*,  
811 97(20):10701–10705, September 2000.
- 812 [12] W. D. Hamilton. The genetical evolution of social behaviour I and II. *Journal of Theoretical Biology*,  
813 7(1):1–52, July 1964.
- 814 [13] John Maynard Smith. Group Selection and Kin Selection. *Nature*, 201(4924):1145–1147, March 1964.
- 815 [14] Sewall Wright. Tempo and Mode in Evolution: A Critical Review. *Ecology*, 26(4):415–419, 1945.
- 816 [15] George R. Price. Selection and Covariance. *Nature*, 227(5257):520–521, August 1970. 01240.
- 817 [16] Michael J. Wade. A Critical Review of the Models of Group Selection. *The Quarterly Review of Biology*,  
818 53(2):101–114, June 1978. ArticleType: research-article / Full publication date: Jun., 1978 / Copyright  
819 © 1978 The University of Chicago Press.



- 820 [17] William M Muir. Group selection for adaptation to multiple-hen cages: selection program and direct  
821 responses. *Poultry Science*, 75(4):447–458, 1996.
- 822 [18] David C. Queller and Joan E. Strassmann. Kin Selection and Social Insects. *BioScience*, 48(3):165–175,  
823 March 1998.
- 824 [19] Michael J Wade. An experimental study of kin selection. *Evolution*, pages 844–855, 1980.
- 825 [20] Arne Traulsen and Martin A. Nowak. Evolution of cooperation by multilevel selection. *Proceedings of*  
826 *the National Academy of Sciences*, 103(29):10952–10955, July 2006.
- 827 [21] L. Lehmann, L. Keller, S. West, and D. Roze. Group selection and kin selection: Two concepts but one  
828 process. *Proc Natl Acad Sci USA*, 104(16):6736–6739, April 2007.
- 829 [22] Benjamin Kerr. Theoretical and experimental approaches to the evolution of altruism and the levels  
830 of selection. *Experimental Evolution: Concepts, Methods, and Applications of Selection Experiments*,  
831 pages 585–630, 2009. 00006.
- 832 [23] Herwig Bachmann, Frank J Bruggeman, Douwe Molenaar, Filipe Branco dos Santos, and Bas Teusink.  
833 Public goods and metabolic strategies. *Current Opinion in Microbiology*, 31:109–115, June 2016. 00000.
- 834 [24] Katrin Hammerschmidt, Caroline J. Rose, Benjamin Kerr, and Paul B. Rainey. Life cycles, fitness  
835 decoupling and the evolution of multicellularity. *Nature*, 515(7525):75–79, November 2014.
- 836 [25] Martin A. Nowak. Five Rules for the Evolution of Cooperation. *Science*, 314(5805):1560–1563, December  
837 2006.
- 838 [26] C. J. Goodnight and L. Stevens. Experimental studies of group selection: what do they tell us about  
839 group selection in nature? *The American Naturalist*, 150 Suppl 1:S59–79, July 1997.
- 840 [27] Herwig Bachmann, Martin Fischlechner, Iraes Rabbers, Nakul Barfa, Filipe Branco dos Santos, Douwe  
841 Molenaar, and Bas Teusink. Availability of public goods shapes the evolution of competing meta-  
842 bolic strategies. *Proceedings of the National Academy of Sciences of the United States of America*,  
843 110(35):14302–14307, August 2013.
- 844 [28] John S Chuang, Olivier Rivoire, and Stanislas Leibler. Simpson’s paradox in a synthetic microbial  
845 system. *Science (New York, N.Y.)*, 323(5911):272–275, January 2009.
- 846 [29] Wenying Shou. Acknowledging selection at sub-organismal levels resolves controversy on pro-cooperation  
847 mechanisms. *eLife*, page e10106, December 2015.
- 848 [30] R C Lewontin. The Units of Selection. *Annual Review of Ecology and Systematics*, 1(1):1–18, 1970.
- 849 [31] D. S. Wilson. A theory of group selection. *Proceedings of the National Academy of Sciences*, 72(1):143–  
850 146, January 1975.
- 851 [32] Michael E Gilpin. *Group selection in predator-prey communities*, volume 9. Princeton University Press,  
852 1975.
- 853 [33] J. Maynard Smith. Group Selection. *The Quarterly Review of Biology*, 51(2):277–283, June 1976.
- 854 [34] Michael Doebeli, Yaroslav Ispolatov, and Burt Simon. Towards a mechanistic foundation of evolutionary  
855 theory. *eLife*, 6:e23804, February 2017.
- 856 [35] L. Chao and B.R. Levin. Structured habitats and the evolution of anticompetitor toxins in bacteria.  
857 *Proc Natl Acad Sci U S A*, 78(10):6324–8, October 1981.
- 858 [36] Hywel T. P. Williams and Timothy M. Lenton. Artificial selection of simulated microbial ecosystems.  
859 *Proceedings of the National Academy of Sciences*, 104(21):8918–8923, May 2007. 00036.
- 860 [37] William Swenson, David Sloan Wilson, and Roberta Elias. Artificial ecosystem selection. *Proceedings*  
861 *of the National Academy of Sciences*, 97:9110–9114, 2000.

- 862 [38] W. Swenson, J. Arendt, and D.S. Wilson. Artificial selection of microbial ecosystems for 3-chloroaniline  
863 biodegradation. *Environ Microbiol*, 2(5):564–71, October 2000.
- 864 [39] Jeremy J. Minty, Marc E. Singer, Scott A. Scholz, Chang-Hoon Bae, Jung-Ho Ahn, Clifton E. Foster,  
865 James C. Liao, and Xiaoxia Nina Lin. Design and characterization of synthetic fungal-bacterial consortia  
866 for direct production of isobutanol from cellulosic biomass. *Proceedings of the National Academy of  
867 Sciences*, 110(36):14592–14597, September 2013. 00024 PMID: 23959872.
- 868 [40] Kang Zhou, Kangjian Qiao, Steven Edgar, and Gregory Stephanopoulos. Distributing a metabolic  
869 pathway among a microbial consortium enhances production of natural products. *Nature biotechnology*,  
870 2015.
- 871 [41] Hyun-Dong Shin, Shara McClendon, Trinh Vo, and Rachel R. Chen. Escherichia coli Binary Culture En-  
872 gineered for Direct Fermentation of Hemicellulose to a Biofuel. *Applied and Environmental Microbiology*,  
873 76(24):8150–8159, December 2010. 00000.
- 874 [42] Shen-Long Tsai, Garima Goyal, and Wilfred Chen. Surface Display of a Functional Minicellulosome  
875 by Intracellular Complementation Using a Synthetic Yeast Consortium and Its Application to Cellu-  
876 lose Hydrolysis and Ethanol Production. *Applied and Environmental Microbiology*, 76(22):7514–7520,  
877 November 2010.
- 878 [43] T Mankad and HR Bungay. Model for microbial growth with more than one limiting nutrient. *Journal  
879 of biotechnology*, 7(2):161–166, 1988.
- 880 [44] Sattar Taheri-Araghi, Serena Bradde, John T. Sauls, Norbert S. Hill, Petra Anne Levin, Johan Paulsson,  
881 Massimo Vergassola, and Suckjoon Jun. Cell-Size Control and Homeostasis in Bacteria. *Current Biology*,  
882 25(3):385–391, February 2015.
- 883 [45] Babak Momeni, Kristen A Brileya, Matthew W Fields, and Wenying Shou. Strong inter-population  
884 cooperation leads to partner intermixing in microbial communities. *eLife*, 2:e00230, 2013. 00000.
- 885 [46] Jeffrey E Barrick, Dong Su Yu, Sung Ho Yoon, Haeyoung Jeong, Tae Kwang Oh, Dominique Schneider,  
886 Richard E Lenski, and Jihyun F Kim. Genome evolution and adaptation in a long-term experiment  
887 with escherichia coli. *Nature*, 461(7268):1243, 2009.
- 888 [47] Toon Swings, Bram Van den Bergh, Sander Wuyts, Eline Oeyen, Karin Voordeckers, Kevin J Verstrepen,  
889 Maarten Fauvart, Natalie Verstraeten, and Jan Michiels. Adaptive tuning of mutation rates allows fast  
890 response to lethal stress in escherichia coli. *eLife*, 6(22939), 2017.
- 891 [48] Clifford Zeyl and J Arjan GM DeVisser. Estimates of the rate and distribution of fitness effects of  
892 spontaneous mutation in saccharomyces cerevisiae. *Genetics*, 157(1):53–61, 2001.
- 893 [49] Rafael Sanjuán, Andrés Moya, and Santiago F Elena. The distribution of fitness effects caused by  
894 single-nucleotide substitutions in an rna virus. *Proceedings of the National Academy of Sciences of the  
895 United States of America*, 101(22):8396–8401, 2004.
- 896 [50] Karen S Sarkisyan, Dmitry A Bolotin, Margarita V Meer, Dinara R Usmanova, Alexander S Mishin,  
897 George V Sharonov, Dmitry N Ivankov, Nina G Bozhanova, Mikhail S Baranov, Onuralp Soylemez,  
898 et al. Local fitness landscape of the green fluorescent protein. *Nature*, 533(7603):397–401, 2016.
- 899 [51] Dominika M Wloch, Krzysztof Szafranec, Rhona H Borts, and Ryszard Korona. Direct estimate of the  
900 mutation rate and the distribution of fitness effects in the yeast saccharomyces cerevisiae. *Genetics*,  
901 159(2):441–452, 2001.
- 902 [52] Celia Payen, Anna B Sunshine, Giang T Ong, Jamie L Pogachar, Wei Zhao, and Maitreya J Dunham.  
903 High-throughput identification of adaptive mutations in experimentally evolved yeast populations. *PLoS  
904 genetics*, 12(10):e1006339, 2016.
- 905 [53] Adam James Waite, Caroline Cannistra, and Wenying Shou. Defectors Can Create Conditions That  
906 Rescue Cooperation. *PLoS Comput Biol*, 11(12):e1004645, December 2015. 00000.

- 907 [54] Richard E Lenski and Michael Travisano. Dynamics of adaptation and diversification: a 10,000-  
908 generation experiment with bacterial populations. *Proceedings of the National Academy of Sciences*,  
909 91(15):6808–6814, 1994.
- 910 [55] Adam James Waite and Wenying Shou. Adaptation to a new environment allows cooperators to purge  
911 cheaters stochastically. *Proceedings of the National Academy of Sciences*, 109(47):19079–19086, 2012.
- 912 [56] Paul B Rainey and Katrina Rainey. Evolution of cooperation and conflict in experimental bacterial  
913 populations. *Nature*, 425(6953):72, 2003.
- 914 [57] Rafael U Ibarra, Jeremy S Edwards, and Bernhard O Palsson. Escherichia coli k-12 undergoes adaptive  
915 evolution to achieve in silico predicted optimal growth. *Nature*, 420(6912):186, 2002.
- 916 [58] Thomas Egli. *Nutrition, microbial*. Oxford: Elsevier Academic Press, 2009.
- 917 [59] R Haselkorn. Heterocysts. *Annual Review of Plant Physiology*, 29(1):319–344, June 1978.
- 918 [60] Ronald Aylmer Fisher. *The genetical theory of natural selection: a complete variorum edition*. Oxford  
919 University Press, 1999.
- 920 [61] Nick Colegrave. Sex releases the speed limit on evolution. *Nature*, 420(6916):664–666, 2002.
- 921 [62] Philip J Gerrish and Richard E Lenski. The fate of competing beneficial mutations in an asexual  
922 population. *Genetica*, 102:127, 1998.
- 923 [63] Stephen T Chisholm, Gitta Coaker, Brad Day, and Brian J Staskawicz. Host-microbe interactions:  
924 shaping the evolution of the plant immune response. *Cell*, 124(4):803–814, 2006.
- 925 [64] Ruth E Ley, Micah Hamady, Catherine Lozupone, Peter J Turnbaugh, Rob Roy Ramey, J Stephen  
926 Bircher, Michael L Schlegel, Tammy A Tucker, Mark D Schrenzel, Rob Knight, et al. Evolution of  
927 mammals and their gut microbes. *Science*, 320(5883):1647–1651, 2008.
- 928 [65] Kevin R Foster, Jonas Schluter, Katharine Z Coyte, and Seth Rakoff-Nahoum. The evolution of the  
929 host microbiome as an ecosystem on a leash. *Nature*, 548(7665):43, 2017.
- 930 [66] Luc De Vuyst, Raf Callewaert, and Kurt Crabb. Primary metabolite kinetics of bacteriocin bi-  
931 osynthesis by *Lactobacillus amylovorus* and evidence for stimulation of bacteriocin production under  
932 unfavourable growth conditions. *Microbiology*, 142(4):817–827, 1996.
- 933 [67] Babak Momeni, Kristen A Brileya, Matthew W Fields, and Wenying Shou. Strong inter-population  
934 cooperation leads to partner intermixing in microbial communities. *eLife*, 2, January 2013.
- 935 [68] Wenying Shou, Sri Ram, and Jose M. G. Vilar. Synthetic cooperation in engineered yeast populations.  
936 *Proceedings of the National Academy of Sciences of the United States of America*, 104(6):1877–1882,  
937 February 2007. 00137.
- 938 [69] Melanie JI Müller, Beverly I Neugeboren, David R Nelson, and Andrew W Murray. Genetic drift opposes  
939 mutualism during spatial population expansion. *Proceedings of the National Academy of Sciences*,  
940 111(3):1037–1042, 2014.
- 941 [70] Kai Zhuang, Goutham N Vemuri, and Radhakrishnan Mahadevan. Economics of membrane occupancy  
942 and respiro-fermentation. *Molecular systems biology*, 7(1):500, 2011.
- 943 [71] Joan B Peris, Paulina Davis, José M Cuevas, Miguel R Nebot, and Rafael Sanjuán. Distribution of  
944 fitness effects caused by single-nucleotide substitutions in bacteriophage  $\phi$ 1. *Genetics*, 185(2):603–609,  
945 2010.
- 946 [72] Adrian WR Serohijos and Eugene I Shakhnovich. Merging molecular mechanism and evolution: theory  
947 and computation at the interface of biophysics and evolutionary population genetics. *Current opinion*  
948 *in structural biology*, 26:84–91, 2014.

- 949 [73] Adam Eyre-Walker and Peter D Keightley. The distribution of fitness effects of new mutations. *Nature*  
950 *reviews. Genetics*, 8(8):610, 2007.
- 951 [74] Michael A Stiffler, Doeke R Hekstra, and Rama Ranganathan. Evolvability as a function of purifying  
952 selection in tem-1  $\beta$ -lactamase. *Cell*, 160(5):882–892, 2015.
- 953 [75] John W Drake. A constant rate of spontaneous mutation in dna-based microbes. *Proceedings of the*  
954 *National Academy of Sciences*, 88(16):7160–7164, 1991.
- 955 [76] Gregory I. Lang and Andrew W. Murray. Estimating the Per-Base-Pair Mutation Rate in the Yeast  
956 *Saccharomyces cerevisiae*. *Genetics*, 178(1):67–82, January 2008.
- 957 [77] Sasha F Levy, Jamie R Blundell, Sandeep Venkataram, Dmitri A Petrov, Daniel S Fisher, and Ga-  
958 vin Sherlock. Quantitative evolutionary dynamics using high-resolution lineage tracking. *Nature*,  
959 519(7542):181, 2015.
- 960 [78] Maureen E Hillenmeyer, Eula Fung, Jan Wildenhain, Sarah E Pierce, Shawn Hoon, William Lee, Michael  
961 Proctor, Robert P St Onge, Mike Tyers, Daphne Koller, et al. The chemical genomic portrait of yeast:  
962 uncovering a phenotype for all genes. *Science*, 320(5874):362–365, 2008.
- 963 [79] Lília Perfeito, Lisete Fernandes, Catarina Mota, and Isabel Gordo. Adaptive mutations in bacteria:  
964 high rate and small effects. *Science*, 317(5839):813–815, 2007.
- 965 [80] John H Gillespie. Molecular evolution over the mutational landscape. *Evolution*, 38(5):1116–1129, 1984.
- 966 [81] H Allen Orr. The distribution of fitness effects among beneficial mutations. *Genetics*, 163(4):1519–1526,  
967 2003.
- 968 [82] Marianne Imhof and Christian Schlötterer. Fitness effects of advantageous mutations in evolving esche-  
969 richia coli populations. *Proceedings of the National Academy of Sciences*, 98(3):1113–1117, 2001.
- 970 [83] Rees Kassen and Thomas Bataillon. Distribution of fitness effects among beneficial mutations before  
971 selection in experimental populations of bacteria. *Nature genetics*, 38(4):484, 2006.
- 972 [84] Darin R Rokyta, Paul Joyce, S Brian Caudle, and Holly A Wichman. An empirical test of the mutational  
973 landscape model of adaptation using a single-stranded dna virus. *Nature genetics*, 37(4):441, 2005.
- 974 [85] Darin R Rokyta, Craig J Beisel, Paul Joyce, Martin T Ferris, Christina L Burch, and Holly A Wichman.  
975 Beneficial fitness effects are not exponential for two viruses. *Journal of molecular evolution*, 67(4):368,  
976 2008.
- 977 [86] Michael J Wisser, Noah Ribeck, and Richard E Lenski. Long-term dynamics of adaptation in asexual  
978 populations. *Science*, 342(6164):1364–1367, 2013.
- 979 [87] Lukasz Jasnos and Ryszard Korona. Epistatic buffering of fitness loss in yeast double deletion strains.  
980 *Nature genetics*, 39(4):550, 2007.
- 981 [88] Rafael Sanjuán, Andrés Moya, and Santiago F Elena. The contribution of epistasis to the architecture  
982 of fitness in an rna virus. *Proceedings of the National Academy of Sciences of the United States of*  
983 *America*, 101(43):15376–15379, 2004.
- 984 [89] Aisha I Khan, Duy M Dinh, Dominique Schneider, Richard E Lenski, and Tim F Cooper. Negative  
985 epistasis between beneficial mutations in an evolving bacterial population. *Science*, 332(6034):1193–  
986 1196, 2011.
- 987 [90] Santiago F Elena and Richard E Lenski. Test of synergistic interactions among deleterious mutations  
988 in bacteria. *Nature*, 390(6658):395, 1997.
- 989 [91] Carlos L Araya, Douglas M Fowler, Wentao Chen, Ike Muniez, Jeffery W Kelly, and Stanley Fields. A  
990 fundamental protein property, thermodynamic stability, revealed solely from large-scale measurements  
991 of protein function. *Proceedings of the National Academy of Sciences*, 109(42):16858–16863, 2012.

- 992 [92] Hsin-Hung Chou, Hsuan-Chao Chiu, Nigel F Delaney, Daniel Segrè, and Christopher J Marx. Diminis-  
993 hing returns epistasis among beneficial mutations decelerates adaptation. *Science*, 332(6034):1190–1192,  
994 2011.
- 995 [93] Sergey Kryazhimskiy, Daniel P Rice, Elizabeth R Jerison, and Michael M Desai. Global epistasis makes  
996 adaptation predictable despite sequence-level stochasticity. *Science*, 344(6191):1519–1522, 2014.
